# 1 **Codon usage influences fitness through RNA toxicity**

2 Pragma Mittal<sup>1</sup>, James Brindle<sup>1</sup>, Julie Stephen<sup>1</sup>, Joshua B. Plotkin<sup>2</sup>, Grzegorz Kudla<sup>1\*</sup>

3

4 <sup>1</sup>MRC Human Genetics Unit, IGMM, University of Edinburgh, Edinburgh, Scotland, UK.

5 <sup>2</sup>University of Pennsylvania, Philadelphia, USA

6

## 7 **Abstract**

8 Many organisms are subject to selective pressure that gives rise to unequal usage of  
9 synonymous codons, known as codon bias. To experimentally dissect the mechanisms of  
10 selection on synonymous sites, we expressed several hundred synonymous variants of the  
11 GFP gene in *Escherichia coli*, and used quantitative growth and viability assays to estimate  
12 bacterial fitness. Unexpectedly, we found many synonymous variants whose expression was  
13 toxic to *E. coli*. Unlike previously studied effects of synonymous mutations, the effect that  
14 we discovered is independent of translation, but it depends on the production of toxic mRNA  
15 molecules. We identified RNA sequence determinants of toxicity, and evolved suppressor  
16 strains that can tolerate the expression of toxic GFP variants. Genome sequencing of these  
17 suppressor strains revealed a cluster of promoter mutations that prevented toxicity by  
18 reducing mRNA levels. We conclude that translation-independent RNA toxicity is a  
19 previously unrecognized obstacle in bacterial gene expression.

20

## 21 **Significance statement**

22 Synonymous mutations in genes do not change protein sequence, but they may affect gene  
23 expression and cellular function. Here we describe an unexpected toxic effect of synonymous  
24 mutations in *Escherichia coli*, with potentially large implications for bacterial physiology and  
25 evolution. Unlike previously studied effects of synonymous mutations, the effect that we  
26 discovered is independent of translation, but it depends on the production of toxic mRNA

27 molecules. We hypothesize that the mechanism we identified influences the evolution of  
28 endogenous genes in bacteria, by imposing selective constraints on synonymous mutations  
29 that arise in the genome. Of interest for biotechnology and synthetic biology, we identify  
30 bacterial strains and growth conditions that alleviate RNA toxicity, thus allowing efficient  
31 overexpression of heterologous proteins.

32

### 33 **Main text**

34 Although synonymous mutations do not change the encoded protein sequence, they cause a  
35 broad range of molecular phenotypes, including changes of transcription<sup>1</sup>, translation  
36 initiation<sup>2,3</sup>, translation elongation<sup>4</sup>, translation accuracy<sup>5,6</sup>, RNA stability<sup>7</sup>, and splicing<sup>8</sup>.

37 As a result, synonymous mutations are under subtle but non-negligible selective pressure,  
38 which manifests itself in the unequal usage of synonymous codons across genes and genomes  
39<sup>9-11</sup>. Several recent experiments directly measured the effects of synonymous mutations on  
40 fitness in bacteria<sup>2,12-17</sup>. It has been commonly assumed that fitness depends primarily on the  
41 efficiency, accuracy, and yield of translation. Here we show that in the context of  
42 heterologous gene expression in *E. coli*, large effects of synonymous mutations on fitness are  
43 translation-independent, and are mediated by RNA toxicity.

44 To study the effects of synonymous mutations on bacterial fitness, we used an IPTG-  
45 inducible, bacteriophage T7 polymerase-driven plasmid to express a collection of  
46 synonymous variants of the GFP gene<sup>2</sup> in *E. coli* BL21-Gold(DE3) (henceforth referred to as  
47 BL21) cells (see Methods). Without IPTG induction, there were no discernible differences in  
48 growth between strains (Figure 1A). When induced with IPTG, the growth rate of GFP-  
49 producing strains was reduced, consistent with the metabolic burden conferred by  
50 heterologous gene expression. The growth phenotype varied remarkably between strains  
51 expressing different synonymous variants of GFP (Figure 1B, Supp Figure 1). "Slow"

52 variants caused a long lag phase post-induction, indicating that at this stage the cells either  
53 stopped growing or died, while "fast" variants showed growth rates closer to non-induced  
54 cells. Several hours after induction, the slow variants appeared to resume growth (Figure 1B):  
55 we found that this was related to the emergence of suppressor strains that could tolerate the  
56 expression of these variants (Supp Figure 1D, and see below).

57 We quantified cell viability post-induction by assessing the colony-forming ability of cells  
58 (Figure 1C). Fast variants showed the expected increase in cell numbers post-induction, but  
59 slow variants caused a 1000-fold decrease in viable cell numbers. Similarly, spotting of non-  
60 induced cells onto LB plates with IPTG showed that the slow variants formed markedly  
61 fewer colonies than fast variants (Figure 1D). Microscopic analysis of slow variants showed  
62 decrease in cell number, growth arrest and in some cases massive cell death following IPTG  
63 induction. In the case of fast variants we observed normal increase in cell numbers and  
64 negligible cell death after induction (Supp Figure 2). These results indicate that certain  
65 synonymous variants of GFP cause significant growth defects when overexpressed in *E. coli*  
66 cells, and we will henceforth refer to these variants as "toxic".

67 To test if toxicity was specific to T7 promoter-driven overexpression, we analysed growth  
68 phenotypes following the expression of a subset of GFP variants using a bacterial polymerase  
69 (*trp/lac*) promoter system (Methods). Although the growth phenotypes measured with  
70 bacterial promoter constructs were not as dramatic as with T7-based constructs, presumably  
71 because of lower GFP expression levels, growth rates with both types of promoters were  
72 correlated with each other (Figure 1E). Interestingly, toxicity increased at high temperature,  
73 and decreased at low temperature (Supp Figure 1C). Taken together, these results indicate  
74 that the toxic GFP variants cause growth defects in two different *E. coli* strains, with two  
75 types of promoters, possibly through a common mechanism.

76 To understand if toxicity depends on the process of translation, we selected several toxic and  
77 nontoxic variants of GFP and mutated their Shine-Dalgarno (SD) sequences from GAAGGA  
78 to TTCTCT to prevent ribosome binding and block translation initiation. As expected,  
79 mutation of SD sequences completely inhibited the production of functional GFP protein  
80 from all tested constructs (Figure 2A). To our surprise, GFP variants without SD sequences  
81 remained toxic, and their effects on growth were indistinguishable from variants with a  
82 functional SD sequence (Figure 2B). Western blot analysis confirmed that mutation of the SD  
83 sequences ablates GFP expression (Supp Figure 3). We considered the possibility that a  
84 cryptic SD element within the coding region allowed translation of a truncated fragment of  
85 GFP, which would be consistent with loss of GFP fluorescence and translation-dependent  
86 toxicity. However, analysis of the coding regions with the RBS Calculator<sup>18</sup> revealed no  
87 strong SD consensus sequences. These results raise the possibility that toxicity might arise at  
88 the RNA level, rather than at translation or protein level.

89 To identify sequence elements required for toxicity, we selected one of the toxic variants  
90 (GFP\_170), and a nontoxic variant (GFP\_012), and performed DNA shuffling<sup>19</sup> to generate  
91 constructs that consisted of random fragments of GFP\_170 and GFP\_012. All the shuffled  
92 and non-shuffled constructs we generated encoded the same GFP protein sequence. Analysis  
93 of growth rate phenotypes of these shuffled constructs revealed a fragment near the 3' end of  
94 the GFP\_170 coding sequence (nt 514-645) that was sufficient to elicit the toxic phenotype  
95 (Figure 2C, Supp Figure 4A, B). Some mutations outside of the toxic region partially  
96 improved fitness, which might be explained by interactions of the RNA secondary structure  
97 between the toxic region and the mutated regions. The GFP\_170 mRNA is predicted to have  
98 a very low translation initiation rate, due to strong RNA secondary structure near the mRNA  
99 5' end<sup>2</sup>. Nevertheless, replacement of the strongly structured 5' region with an unstructured  
100 fragment did not affect toxicity (Supp Figure 4A, B).

101 The above results led us to hypothesize that the toxicity associated with GFP expression was  
102 independent of translation, but depended on the presence of a specific fragment of RNA. To  
103 test this hypothesis, we performed growth rate measurements with a series of constructs.  
104 First, we isolated the 132-nt toxic region identified in the DNA shuffling experiment, and  
105 expressed it on its own, with or without start and stop codons. The expression of the 132-nt  
106 fragment of GFP\_170 was sufficient for toxicity, whereas the corresponding fragment of  
107 GFP\_012 did not cause toxicity. The effect of the 132-nt fragments on growth did not depend  
108 on the presence of translation start and stop codons (Figures 2C, D), the fragments contained  
109 no cryptic translation initiation signals, and FLAG tag fusions showed no detectable protein  
110 expression from the GFP\_170 fragment in any of the three reading frames (Supp Figure 3B).  
111 Second, we introduced stop codons upstream of the toxic fragment in the GFP\_170 coding  
112 sequence, and in the corresponding positions of GFP\_012. This placement of stop codons  
113 ensures that ribosomes terminate translation before reaching the putative toxic region of the  
114 RNA, while still allowing a full-length transcript to be produced. As expected, internal stop  
115 codons abrogated GFP protein production (Figure 2C), but despite the presence of premature  
116 stop codons, GFP\_170\_Stop still caused toxicity to bacterial cells while GFP\_012\_Stop  
117 remained non-toxic (Figure 2D). To remove possible out-of-frame translation, we inserted  
118 stop codons into GFP\_170 in all three frames, before and after the toxic region, and toxicity  
119 remained the same in all cases (Supp Figure 4C). Third, we introduced an efficient synthetic  
120 T7 transcription terminator<sup>20</sup> upstream of the toxic region in GFP\_170 and in the  
121 corresponding location in GFP\_012. Notably, we found that both variants with internal  
122 transcription terminators became nontoxic, and GFP\_170\_TT grew slightly faster than  
123 GFP\_012\_TT (Figure 2D). The GFP\_170 fragment also caused toxicity when fused to FLAG  
124 tags (in any of the three reading frames), and when fused to fluorescent protein mKate2, it  
125 caused toxicity and reduced expression of mKate2 by 50-fold (Supp Figure 4D, E, F).

126 Overall, these data suggest that toxicity is caused by the RNA itself, rather than the process of  
127 translation or by the protein produced.

128 To investigate the sequence determinants of RNA-mediated toxicity, we measured the growth  
129 phenotypes of single synonymous mutations within the 132-nt region of GFP\_170. Close to  
130 half of these mutations reduced or abolished the toxic phenotype, whereas the remaining  
131 mutations had no effect (Figure 3A). There was no clear relationship between the position of  
132 mutations within the region and their effect on growth, nor was there any relationship  
133 between the type of nucleotide introduced and growth. RNA toxicity associated with triplet  
134 repeats has been described in Eukaryotes<sup>21</sup>, but we found no triplet repeats in the toxic GFP  
135 mRNAs. Consistent with our observation that the toxic effect does not require translation,  
136 codon adaptation index was not associated with toxicity (Figure 3B). RNA folding energy,  
137 measured either in the immediate vicinity of each mutation, or for the entire 132-nt  
138 mutagenized region, was not correlated with toxicity, and we were unable to identify any  
139 RNA structural elements associated with the toxic phenotype (data not shown). We further  
140 probed the effects of sets of several mutations within the 132-nt toxic region. 75/98 sets of  
141 mutations we introduced within the region reduced or abolished toxicity, whereas 23/98 sets  
142 had no effect (Supp Figure 5). In almost all cases, the phenotypes of sets could be deduced  
143 from the effects of individual mutations in a simple way: if any mutation in a set abolished  
144 toxicity, then the set also did. Four sets did not conform to this rule, indicating potential  
145 epistatic interactions between mutations (not shown). Mutations near the 3' end of the 132-nt  
146 fragment had no effect on toxicity, identifying a minimal toxicity-determining region of  
147 about a hundred nucleotides that either consists of a single functional element, or it contains  
148 multiple elements whose cooperative action causes toxicity.

149 Several recent studies examined the effects of synonymous mutations on fitness in bacteria,  
150 either in endogenous genes, or in overexpressed heterologous genes<sup>2, 12-16</sup>. Fitness had been

151 found to correlate with the codon adaptation index (CAI), GC content, RNA folding, protein  
152 expression level, a codon ramp near the start codon, and measured or predicted translation  
153 initiation rates. We quantified these variables in a set of 190 synonymous variants of GFP,  
154 and analysed their impact on fitness. We also considered two candidate toxic RNA fragments  
155 (GFP\_170, nt 514-645, and GFP\_155, nt 490-720), both of which were common to several  
156 constructs and appeared to negatively influence fitness (Figures 3C, D). High protein  
157 expression was previously shown to correlate with slow growth<sup>14</sup>, whereas we found positive  
158 correlations of fitness with total protein yield or protein yield per cell. These correlations  
159 presumably reflect reduced protein yields and cell growth after the induction of toxic RNAs.  
160 As seen previously, growth rate and optical density were positively correlated with CAI, and  
161 GC content was correlated with optical density<sup>2, 16</sup>. However, in a multiple regression  
162 analysis aimed to disentangle the effects of these covariates, we found that the presence of  
163 candidate toxic RNA fragments predicted slow growth in both BL21 and DH5 $\alpha$  cells,  
164 whereas CAI and GC3 did not (Methods). This suggests that the apparent correlation of CAI  
165 or GC content with fitness, observed in this and previous studies<sup>2, 16</sup>, might result from the  
166 confounding effect of toxic RNA fragments (Supp Figure 6A, B). Consistently, an  
167 experiment with 22 new, unrelated synonymous GFP constructs spanning a wider range of  
168 GC content showed no correlation between GC content and bacterial growth (Supp Figure  
169 6C, D). To further test whether toxicity could be explained by unusually high expression of  
170 certain GFP variants, we measured the mRNA abundance of 79 toxic and non-toxic RNAs by  
171 Northern blots, and correlated GFP mRNA abundance per cell with OD. Although we  
172 observed differences in mRNA abundance, mostly related to mRNA folding<sup>2</sup>, we find no  
173 significant correlation between RNA abundance and toxicity (Spearman rho=0.12, p=0.29).  
174 Furthermore, we detected no consistent differences in plasmid abundance between toxic and  
175 nontoxic variants.

176 To study the molecular mechanisms of toxicity caused by mRNA overexpression, we aimed  
177 to evolve genetic suppressors of this phenotype. We selected several GFP constructs that  
178 showed both strong toxicity and moderate or high GFP fluorescence, and plated bacteria  
179 containing these constructs on LB agar plates with IPTG and ampicillin. We observed a  
180 number of large white colonies that apparently expressed no GFP, and smaller bright green  
181 colonies producing high amounts of the GFP protein (Figure 4A). We hypothesized that the  
182 green colonies have acquired a genomic mutation that allowed cells to survive while  
183 expressing toxic RNAs. To support this, we cured the evolved strains of their respective  
184 plasmids and re-transformed the cured strains with the same plasmid. The re-transformed  
185 strains readily formed bright green colonies on IPTG+ampicillin plates, and exhibited faster  
186 growth rates in IPTG medium compared to the parental strain. This supported our hypothesis  
187 that the mutations were located on the chromosome and not the plasmid. We therefore  
188 selected 22 evolved strains and the parental strain for genome sequencing, and used the  
189 GATK pipeline for calling variants (Methods).

190 In all green suppressor strains, we found a single cluster of mutations in the  $P_{lac}$  promoter of  
191 the T7 polymerase gene that explains the suppressor phenotype (Figure 4B, C, Supp Table 1).  
192 The parental BL21 strain contains two alleles of the  $P_{lac}$  promoter: the wild-type allele  $P_{lacWT}$   
193 controls the lac operon, and a stronger derivative allele  $P_{lacUV5}$  controls T7 RNA polymerase.  
194 In the suppressor strains, recombination between these two loci associates  $P_{lacWT}$  promoter  
195 with T7 polymerase, leading to reduced levels of polymerase and presumably to reduced  
196 transcription of GFP. The same  $P_{lac}$  promoter mutations were recently observed in the  
197 C41(DE3) and C43(DE3) strains of *E. coli* (the "Walker strains"), and were responsible for  
198 the reduced T7 RNA polymerase expression, high-level recombinant protein production, and  
199 improved growth characteristics of those strains<sup>22-24</sup>. Similar to our suppressor strains,  
200 C41(DE3) and C43(DE3) allowed high protein expression of toxic GFP variants, and little



201 toxicity was observed in these strains (Figure 4D). Taken together, these results support our  
202 conclusion that high levels of RNA, rather than RNA translation or protein, are responsible  
203 for toxicity.

204 To test whether translation-independent RNA toxicity might affect genes other than GFP, we  
205 turned to the *ogcp* gene, which encodes a membrane protein Oxoglutarate-malate transport  
206 protein (OGCP) believed to be toxic for *E. coli*. OGCP overexpression was originally used to  
207 derive the C41(DE3) strain, now commonly used for recombinant protein expression<sup>22</sup>. As  
208 expected, we found that expression of OGCP was toxic to BL21 but not to C41(DE3) cells. In  
209 agreement with our observations for GFP, a translation-incompetent variant of OGCP lacking  
210 the Shine-Dalgarno sequence was just as toxic to BL21 cells as a translation-competent  
211 variant (Supp Figure 7). A translation-competent, codon-optimized variant of OGCP retained  
212 toxicity in BL21 cells. These experiments suggest that translation-independent RNA toxicity  
213 might be a widespread phenomenon associated with heterologous gene expression in *E. coli*.

214 Heterologous protein expression is known to inhibit growth of *E. coli*. Toxicity is typically  
215 attributed to the foreign protein itself, and it is often remedied by lowering expression,  
216 reducing growth temperature, or using special strains of *E. coli* such as C41(DE3). Here we  
217 demonstrate that the same strategies and strains also prevent toxicity when RNA, rather than  
218 protein, is the toxic molecule. We speculate that other cases of toxicity, previously attributed  
219 to proteins, may in fact be caused by RNA. Although the molecular mechanisms of RNA  
220 toxicity are presently unclear, we identified several GFP and OGCP variants with similar  
221 phenotypes, suggesting that the phenomenon may be common. Interestingly, induction of  
222 wild-type APE\_0230.1 in *E. coli* inhibits growth, but a codon-optimized variant does not  
223 inhibit growth despite increased protein yield<sup>25</sup>. In addition, several recent high-throughput  
224 studies found unexplained cases of slow growth or toxicity upon the expression of various

225 random sequences in *E. coli*<sup>14, 26, 27</sup>. Our results point to RNA toxicity as a possible cause of  
226 these observations.

227 Our results are relevant to the phenomenon of synonymous site selection in microorganisms.  
228 Synonymous mutations can influence fitness directly (in cis), by changing the expression of  
229 the gene in which the mutation occurs<sup>12, 13, 15</sup>, or indirectly (in trans), by influencing the  
230 global metabolic cost of expression<sup>2, 14, 16, 28</sup>. Experiments with essential bacterial genes  
231 predominately uncover cis-effects, most of them mediated by changes of RNA structure or  
232 other properties that influence translation yield. For example, mutations in *Salmonella*  
233 *enterica rpsT* downregulated the gene, and could be compensated by additional mutations in  
234 or around *rpsT* or by increase of the gene copy number<sup>13</sup>. Similarly, mutations that disrupted  
235 mRNA structure of the *E. coli infA* gene, through local or long-range effects, explained much  
236 variation in fitness across a large collection of mutants<sup>12</sup>. Protein abundance and RNA  
237 structure contribute to the observed trans-effect of mutations<sup>14</sup>. Although our results are  
238 broadly consistent with a role of RNA structure, the specific structure is unknown, and the  
239 effects we uncovered are translation-independent, suggesting that a novel mechanism is  
240 involved. Toxic RNAs might interact with an essential cellular component, either nucleic acid  
241 or protein, and interfere with its normal function. Such interactions might be uncovered by  
242 pulldowns of toxic RNAs combined with sequencing or mass spectrometry. Alternatively,  
243 RNA phase transitions may be involved; such transitions have been shown to contribute to  
244 the pathogenicity of CAG-expansion disorders in Eukaryotes, providing a mechanistic  
245 explanation for this phenomenon<sup>29</sup>. Further studies will address the mechanisms,  
246 biotechnology applications, and evolutionary consequences of RNA toxicity in bacteria.

## 247 **Supplementary Methods**

### 248 **Genes, plasmids and bacterial strains**

249 We used a collection of 347 individually cloned full-length synonymous variants of the GFP  
250 gene. 154 of these variants came from our previous study<sup>2</sup>, while the others were ordered as  
251 gBlocks from Integrated DNA Technologies (IDT), generated from existing variants by DNA  
252 shuffling<sup>19</sup> or made by site-directed mutagenesis, as described below. The coding sequences  
253 of all variants are provided as a fasta file. The GFP library was cloned into the Gateway entry  
254 plasmid pGK3, and then into Gateway destination plasmids pGK8, a T7 promoter-based  
255 expression plasmid, and pGK16, an expression plasmid with a bacterial *trp/lac* promoter<sup>2</sup>.  
256 Expression from both plasmids is IPTG-inducible; pGK8 produces untagged GFP, whereas  
257 pGK16 encodes a 28-codon 5'-terminal tag with weak mRNA secondary structure, known to  
258 facilitate expression<sup>2</sup>. pGK8 was used for GFP expression in the strain BL21-Gold(DE3) [*E.*  
259 *coli* B F<sup>-</sup> *ompT hsdS*(r<sub>B</sub><sup>-</sup> m<sub>B</sub><sup>-</sup> *dcm*<sup>+</sup> Tet<sup>r</sup> *gal* λ(DE3) *endA Hte*], in C41/C43 strains (Lucigen)  
260 <sup>22</sup>, and in evolved suppressor strains (see below). pGK16 was used for expression in the  
261 DH5α strain [F<sup>-</sup> Φ80*lacZ* ΔM15 Δ(*lacZYA-argF*) U169 *recA1 endA1 hsdR17*(r<sub>k</sub><sup>-</sup>,  
262 m<sub>k</sub><sup>+</sup>) *phoA supE44 thi-1 gyrA96 relA1* λ<sup>-</sup>]

### 263 **Growth assays**

264 For growth rate analysis, three independent colonies of *E. coli* cells carrying each construct of  
265 GFP were grown overnight at 37°C in a 96-well plate with 2 ml wells, with constant shaking  
266 (320 rpm), until the cultures reached saturation. Following that, the culture was diluted 1:100  
267 in 200 μl of LB containing ampicillin (100 μg/ml) in a 96-well plate (Cat No. 655180,  
268 Cellstar). The plate was covered with its lid and placed in an automated plate reader (Tecan  
269 Infinite M200 Pro/ Tecan Sunrise). After an hour of incubating the plate at the appropriate  
270 temperature, typically 37°C, with constant orbital shaking (amplitude-1.5 mm, frequency-335  
271 rpm), the cultures were induced with 1 mM IPTG. Subsequent to induction, plates were

272 incubated in the plate reader with constant shaking as before. To avoid condensation while  
273 adding IPTG we retained the lid of the plate in the plate reader chamber which was  
274 maintained at 37°C and we avoided prolonged manipulation of plate outside the plate reader.  
275 To avoid excessive evaporation of cultures and test for potential contamination, we placed  
276 media without bacterial cultures in the external rows and columns of each plate, and only  
277 used internal wells for experiments. Optical density (OD) was measured at 595nm and GFP  
278 fluorescence was measured with excitation at 485 nm and emission at 515 nm, at fixed time  
279 intervals over a period of 6-8 hrs (or 24 hrs in the low-temperature growth assays). LB-only  
280 wells were used to normalize the background OD and fluorescence. Bacterial growth rate and  
281 fluorescence represent means from three independent experiments, with three replicate  
282 measurements in each experiment.

283 We calculated the growth rates of IPTG-induced cultures as the slope of  $\log_2(\text{OD})$  against  
284 time, normalized to the slope of non-induced cultures. Thus:

285

$$286 \quad \text{growth rate} = \lambda_{\text{induced}} / \lambda_{\text{noninduced}},$$

287

288 where  $\lambda = (\log_2(\text{OD}_t) - \log_2(\text{OD}_0)) / t$ ;  $\text{OD}_0$  and  $\text{OD}_t$  represent the optical densities at the  
289 beginning and end of a time interval, and  $t$  represents the duration of the time interval. We  
290 defined the time interval as the interval between 1 h and 2.5 h after induction, with a further  
291 restriction that the OD of cells is between 0.1 and 1.0.

292 This formula gives a negative growth rate when the OD of the induced culture decreases over  
293 time, seen for example for GFP\_170 in Figure 1B. We explain the slight reduction of OD by  
294 the lysis of a fraction of cells, mediated by expression of the toxic constructs. Indeed, we  
295 could observe cell lysis of GFP\_170-expressing cells under the microscope.

296

297 Typically, the growth rate formula is applied to exponentially growing cells, and only gives  
298 positive values for such cells. In our experiments, although non-induced cells grew  
299 exponentially (Figure 1A), the growth rate of induced cells changed over time (Figure 1B),  
300 due to the combination of reduced growth following the expression of toxic constructs, partial  
301 cell lysis, and emergence of suppressors. Thus, the formula is only meant to approximate the  
302 behaviour of cells and provide a combined estimate of toxicity.

303 Graphs were plotted using GraphPad Prism 7 Software.

### 304 **Cell viability assay**

305 The viability of bacterial cultures was estimated by spot assay or more quantitatively by  
306 measuring the colony forming units. For spot assays, BL21 strains carrying a subset of GFP  
307 constructs were grown in 2 ml LB with ampicillin, overnight in 14 ml falcon tubes with snap  
308 cap, at 37°C. Following growth to saturation, cells were diluted 1:100 in LB containing  
309 ampicillin (100 µg/ml) and allowed to grow until OD reached ~0.5. Cultures in exponential  
310 phase were then diluted in LB (a factor of 10 between each step) and spotted on to LB plates  
311 containing Ampicillin (100 µg/ml) and 1 mM IPTG. Plate containing no IPTG were used as  
312 control to show equal number of cells were spotted. A volume of 10 µl was used for spotting.  
313 For quantitative measurements, exponential phase cultures were induced with 1 mM IPTG.  
314 Following induction, 1 ml of culture was aliquoted at every 1 hr interval and appropriately  
315 diluted (depending on OD) and 100 µl of appropriate dilution was spread on LB-Agar plates  
316 containing ampicillin (100 µg/ml). For each culture two different dilutions were spread at  
317 each time point in duplicate. Plates were then incubated at 37°C until colonies appeared on  
318 them. Viability was assessed by counting the colony forming units (cfu/ml) from the plates.

### 319 **Microscopic analyses of viability**

320 Microscopy slides were prepared as previously published<sup>30</sup>. Briefly, two plain microscopy  
321 slides were cleaned with absolute ethanol. One of the two plastic covers of a gene frame

322 (ABgene; 10 mm x 10 mm) was removed and the adhesive side pressed onto the centre of a  
323 glass slide. 1.5% Low Melting Point (LMP) agarose was dissolved in MQ water. 60  $\mu$ l of the  
324 warm agarose solution was pipetted into the centre of each gene frame. The second glass  
325 slide was placed on top of the gene frame, avoiding the formation of any air bubbles. The  
326 sandwiched slides were allowed to set at 4°C for one hour. Then the upper glass slide was  
327 removed by sliding off gently from the agarose bed. BL21 cultures were grown in LB with  
328 ampicillin until OD reached ~0.2-0.3, following which they were induced with 1 mM IPTG.  
329 Un-induced cultures served as control. Subsequent to induction, aliquots were taken at  
330 appropriate time points. 1  $\mu$ l propidium iodide (Life Technologies, 1mg/ml solution), that  
331 stains dead cells preferentially, was added to the aliquots. The tubes were then incubated at  
332 room temperature in dark for 5 minutes. 4  $\mu$ l of culture was mounted onto the agarose bed  
333 and evenly spread on the agarose bed by turning the slide up and down. A clean glass  
334 coverslip was adhered to the upper adhesive side of the gene frame avoiding any air bubbles.  
335 Slides were imaged using using 100X Lens on a Zeiss Axio-Observer Z1 inverted  
336 microscope (Carl Zeiss UK, Cambridge, UK), with a ASI MS-2000 XY stage (Applied  
337 Scientific Instrumentation, Eugene, OR). Samples were illuminated using brightfield or a  
338 Lumencor Spectra X LED light source (Lumencor Inc, Beaverton, OR) complete with  
339 Chroma #89000ET single excitation and emission filters (Chroma Technology Corp.,  
340 Rockingham, VT) and acquired on an Evolve EMCCD camera (Photometrics, Photometrics,  
341 Tucson, AZ). GFP and RFP channels were used to image GFP and Propidium iodide (GFP-  
342 excitation: 470/22 nm, dichroic: 495 nm emission: 520/28 nm, RFP- excitation: 542/33 nm,  
343 dichroic: 562 nm emission: 593/40 nm). Image was captured using Micromanager  
344 (<https://open-imaging.com/>). For each microscopy slide, at least 10 independent fields were  
345 imaged in multi-channel acquisition mode, whilst remaining as unbiased as possible in order

346 to obtain a true representation of the cell number and morphology of cells in the culture.

347 Acquired images were analysed using ImageJ software.

### 348 **Generation of additional mutated constructs**

349 To prevent the ribosomes from translating, we mutated the Shine-Dalgarno (SD) sequence in  
350 seven GFP constructs. All mutations were performed in the pGK3 plasmid<sup>2</sup>, using a site  
351 directed mutagenesis protocol<sup>31</sup>, employing AccuPrime™ Pfx DNA Polymerase (Thermo  
352 Fisher Scientific). The RBS site aaGAAGGA was changed to tgTTCTCT. The oligos used  
353 were SD\_mut\_Forward and SD\_mut\_Reverse primers (see List of oligos). The mutations  
354 were confirmed by sequencing and the constructs were then sub-cloned into pGK8 using  
355 Gateway cloning. The constructs were then transformed into BL21 cells and growth rates and  
356 fluorescence were analysed as described above.

357 Constructs expressing: 1) 132 nt fragments of GFP\_012 and GFP\_170 with and without start  
358 and stop codons ("Frag" and "Frag\_(s+s)"), 2) GFP\_012 and GFP\_0170 with stop codons at  
359 136<sup>th</sup> and 157<sup>th</sup> codon ("Stop1" and "Stop2"), and 3) GFP\_012 and GFP\_170 with  
360 transcription terminator sequence inserted at 492 nt position ("TT"), were generated as  
361 follows: 132 nt of GFP\_170 and its corresponding region on GFP\_012 were PCR-amplified  
362 using oligos containing BamHI and EcoRI sites (see List of oligos), for cloning into pGK3  
363 plasmid. Start and stop codons were also added to the respective oligos in case of Frag\_(s+s)  
364 constructs. To introduce TAA stop codons at 136<sup>th</sup> and 157<sup>th</sup> codon positions, site directed  
365 mutagenesis was carried out using specific oligos on pGK3-GFP\_012 and pGK3-GFP\_170  
366 plasmids. In the same way we introduced stop codons in all three reading frames at the 157<sup>th</sup>  
367 and 215<sup>th</sup> codon positions of plasmid pGK3-GFP\_170. To introduce Transcription  
368 Terminator (TT), 5'end phosphorylated oligos containing 57 nt sequence of TT, were self-  
369 annealed and cloned into the HpaI site of GFP\_012 and GFP\_170, on pGK3 plasmid. To fuse  
370 FLAG tags with the toxic fragment of GFP\_170 (514-642bp) in all three reading frames, we

371 amplified the GFP fragment from pGK3-GFP\_170 with a forward primer containing a  
372 BamHI site and three individual reverse primers containing the FLAG tag in three different  
373 reading frames along with an EcoRI site. All the above constructs were cloned into pGK3,  
374 confirmed by sequencing and subcloned into pGK8 by Gateway cloning. All pGK8  
375 constructs were then transformed into the BL21 strain and growth and fluorescence were  
376 analysed as above.

377 DNA shuffling was performed as previously reported<sup>19</sup>, with minor modifications. Briefly,  
378 an incomplete DNase I digestion of equimolar concentrations of the two variants was carried  
379 out in the presence of 5 mM MnCl<sub>2</sub>. Mn<sup>2+</sup> ions in the reaction ensure DNaseI digests both  
380 strands of DNA at approximately the same sites<sup>32</sup>. To achieve controlled digestion DNase I  
381 treatment was performed for only 2 minutes at 15°C before inactivating the enzyme at 90°C  
382 for 5 minutes. Digested products were assembled by primerless assembly to obtain larger  
383 fragments of expected size. Assembly PCR was performed using Q5 high fidelity DNA  
384 polymerase (NEB) and PCR conditions were as follows: Annealing temperature:45°C,  
385 extension time:30 secs for 40 cycles. The above step was followed by re-amplification with  
386 oligos pENTR\_seq\_U6 and pENTR\_seq\_L3. We obtained 36 GFP constructs from this  
387 experiment that were made of randomly shuffled fragments of GFP\_012 and GFP\_170. The  
388 shuffled variants encoding the GFP protein sequence were cloned into the pGK16 vector  
389 using Gateway cloning and transformed into DH5α for analysis of growth phenotype.

390 To make synonymous mutations in the region spanning nts 534-642 in GFP\_170, we  
391 designed degenerate oligos in five windows of 20-25 base pairs. In each window all wobble  
392 positions were mutated synonymously, allowing all possible changes at a given position. Site  
393 directed mutagenesis was performed using oligo sets A, B, C, D and E (see list of oligos) and  
394 AccuPrime Pfx DNA Polymerase (Thermo Fisher Scientific). All mutagenesis were carried  
395 out on the pGK3-GFP\_170 plasmid. Mutations were confirmed by sequencing and the



396 constructs were then sub-cloned into pGK8. The number of mutations per construct that we  
397 generated ranged from 2-9 and we obtained 98 constructs from five sets of PCRs. Single  
398 mutations were also generated in the region spanning 540-620 bp. Each wobble position was  
399 mutated synonymously, allowing all possible changes. We generated 36 constructs such that  
400 each construct had only one synonymous mutation per construct at a given codon in the  
401 region. Codons which were exactly the same between GFP\_012 and GFP\_170 were not  
402 mutated.

403 Bovine mitochondrial 2-oxoglutarate carrier protein (OGCP) constructs: wild type OGCP  
404 (OGCP\_WT), OGCP with Shine-Dalgarno sequence changed from GAAGGA to TTCTCT  
405 and with no start codon (OGCP\_noRBS), OGCP with *E. coli*-optimized codons (OGCP\_CO),  
406 were purchased as gBlocks from IDT.

407 mKate2 constructs: A mKate2 gene fusion with the toxic fragment of GFP\_170 was also  
408 ordered as a gBlock from IDT. The fragment contained BamHI and EcoRI sites for cloning  
409 into the pGK3 plasmid. The mKate2 gene by itself was amplified from the mKate-GFP\_170  
410 fusion construct using primers containing BamHI and EcoRI sites for cloning into pGK3. All  
411 constructs were confirmed by sequencing and subcloned into pGK8 by Gateway cloning.

#### 412 **Isolation and validation of genetic suppressors**

413 BL21 cells carrying several GFP variants (both toxic and non-toxic) were plated on LB  
414 agar supplemented with Ampicillin (100 µg/ml) and 1 mM IPTG. We obtained two kinds  
415 of colonies on the plates: highly fluorescent small colonies and large white colonies. We  
416 picked primarily the green colonies and a few white colonies for further analyses. All the  
417 colonies that were picked were plated on LB Agar+Amp plates. All green and some white  
418 colonies grew on Amp plates while some of the whites couldn't grow any further on Amp  
419 plates. 37 colonies that grew on Amp plates (30 green and 7 white) were selected for

420 further study. The growth rate and GFP fluorescence levels were measured for all colonies  
421 as described above.

422 To validate that the mutation that affects the survival of cells on IPTG is located on the  
423 chromosome and not on the plasmid itself, we cured the strains of the plasmid. For curing,  
424 the colonies were streaked on LB Agar plates in absence of Ampicillin repeatedly for at  
425 least 3-4 rounds. Colonies obtained after growing without antibiotic selection were further  
426 replica plated on LB Agar and LB Agar+Amp. Colonies that grew on only LB Agar but  
427 not on LB Agar+Amp were cured of the plasmid. These cured strains were re-transformed  
428 with the same GFP variants from which they were isolated. After re-transformation these  
429 cured strains were plated on LB Agar+Amp+IPTG plates. We obtained only bright green  
430 colonies from the re-transformed cured strain that was originally bright green. However,  
431 the cured strain from white colonies, on retransformation with the same GFP plasmid,  
432 produced a mix of green and white colonies on IPTG plates.

433 To further validate that the mutation was not located on the plasmid we isolated plasmids  
434 from the 37 colonies, and transformed them into fresh competent BL21 strain and assayed  
435 the growth and fluorescence. The phenotype was the same as in the parental strains,  
436 showing that the isolated plasmids did not carry any mutations that affected the phenotype.  
437 To identify the genomic mutations that conferred the suppressor phenotype we selected 22  
438 suppressors (green=18, white=4) for genome sequencing. We also sequenced the genomic  
439 DNA from two independent BL21 parental colonies to serve as reference and control  
440 during the analysis of genome sequences.

#### 441 **Analysis of genome sequence and variant calling**

442 Chromosomal DNA was isolated using the Wizard® Genomic DNA Purification Kit  
443 (Promega, U.S.A.) according to the manufacturer's instructions. The concentration of  
444 genomic DNA was estimated by Qubit dsDNA BR Assay Kit (ThermoFischer Scientific).

445 Quantitation and quality control of genomic DNA was performed on a Bioanalyzer  
446 (Edinburgh Genomics UK). Genomic DNA samples were supplied in required  
447 concentrations for Nextera XT Library preparation, followed by 250-bp paired-end HiSeq  
448 Illumina sequencing (Edinburgh Genomics, UK).  
449 The reads were mapped onto the reference genome sequence of BL21-Gold(DE3)  
450 (GenBank Accession ID CP001665.1) with default settings using bwa<sup>33</sup>. PCR duplicates  
451 were marked using Picard tools (<http://broadinstitute.github.io/picard/>). Genomic variants  
452 (SNPs, indels and insertions) were called using GATK<sup>34</sup>. We used GATK haplotype caller  
453 with ploidy=1, stand\_call\_conf=30 and stand\_emit\_conf=10. Variants were filtered with  
454 parameter settings: DP<9.0 and QUAL<10.0. Bedtools<sup>35</sup> was used to detect unique  
455 variation in our suppressor strains in comparison to the control strain and the reference  
456 genome. Finally, the identified variations were confirmed by targeted PCR amplification  
457 followed by Sanger sequencing. As the lac promoter is duplicated in the BL21-Gold(DE3)  
458 strain, wild type lac promoter ( $P_{lacWT}$ ) and the *lacUV5* promoter ( $P_{lacUV5}$ ) driving the  
459 expression of T7 polymerase, we obtained dual peaks in targeted sequencing of  $P_{lacUV5}$   
460 promoter region. To resolve this we carried out a detailed analysis of this region by extracting  
461 all read pairs where one read of the pair was mapped on to an unduplicated region and the  
462 read pairs were unambiguously assigned to the specific loci on the genome. The genome  
463 sequencing results can be accessed on <https://www.ncbi.nlm.nih.gov/sra/SRP149903>.

#### 464 **Statistical analyses**

465 We annotated the GFP sequences with a range of sequence-derived parameters and  
466 experimental measurements. The codon adaptation index (CAI) was calculated as in<sup>2</sup>  
467 using codon optimality scores from<sup>36</sup>. GC3 content (GC content at the third positions of  
468 codons) was calculated by dividing the number of G- and C-ending codons by the total  
469 number of codons. Folding energy within the window (-4 to +38) relative to the translation

470 start codon <sup>2</sup> was calculated using hybrid-ss-min from the UNAFold package <sup>37</sup>.

471 Translation initiation rate was calculated in a window from -40 to +60 relative to the start  
472 codon using the RBS Calculator <sup>18</sup>. Growth rate was calculated as described in the "growth  
473 assays" section above. OD was measured 3 hr after IPTG induction, after subtraction of  
474 LB-only background. OD and fluorescence measurements from a previous study <sup>2</sup> were  
475 used after converting their units to units measured in the present study with a linear least  
476 squares model. Protein level measurements by Coomassie staining and RNA  
477 measurements by Northern blotting were from a previous study <sup>2</sup>. Protein abundance per  
478 cell was calculated by dividing protein fluorescence by OD.

479 To map the toxicity-determining region of GFP\_170 based on the DNA shuffling  
480 experiment, we used Student's t-test for each synonymous position *i* to compare the growth  
481 rates of variants in which position *i* was derived from GFP\_170 and from GFP\_012. We  
482 applied a Bonferroni correction for 239 tests, resulting in a p-value cutoff of 0.0002  
483 (0.05/239). In this analysis, positions 532-640 from GFP\_170 were associated with  
484 significantly slower growth of shuffled variants. We conservatively defined a slightly  
485 larger fragment (nts 512-645 of GFP\_170) as the putative toxicity-determining region. We  
486 subsequently narrowed down this region based on the results of mutagenesis experiments.

487 Regression analyses were performed in the R software package. Correlations reported in  
488 the text are quantified by the Spearman rank correlation coefficient and its associated p-  
489 value. We performed multiple regression analyses in order to quantify the relative  
490 importance of the various predictor variables in determining growth rates and optical  
491 densities. The output of these analyses, shown below, highlights the predominant influence  
492 of toxic mRNA fragments on growth:

493

494 Multiple regression. Dependent variable: growth rate, BL21 cells

| Coefficients      | Estimate | Std. Error | t value | Pr(> t ) | Significance |
|-------------------|----------|------------|---------|----------|--------------|
| GFP_155_nt490-720 | -0.30111 | 0.05081    | -5.927  | 1.48E-07 | ***          |
| GFP_170_nt514-645 | -0.41221 | 0.04715    | -8.743  | 2.05E-12 | ***          |
| CAI               | 0.24554  | 0.1678     | 1.463   | 0.148444 |              |
| GC3               | -0.03029 | 0.09525    | -0.318  | 0.751524 |              |

495 Signif. codes: 0 '\*\*\*' 0.001 '\*\*' 0.01 '\*' 0.05 '.' 0.1 ' ' 1

496 Residual standard error: 0.1077 on 62 degrees of freedom

497 Multiple R-squared: 0.6612, Adjusted R-squared: 0.6394

498 F-statistic: 30.25 on 4 and 62 DF, p-value: 5.752e-14

499

500 Multiple regression. Dependent variable: growth rate, DH5a cells

| Coefficients      | Estimate | Std. Error | t value | Pr(> t ) | Significance |
|-------------------|----------|------------|---------|----------|--------------|
| GFP_155_nt490-720 | -0.19791 | 0.05044    | -3.924  | 0.000183 | ***          |
| GFP_170_nt514-645 | -0.16322 | 0.03054    | -5.344  | 8.37E-07 | ***          |
| CAI               | 0.17294  | 0.17654    | 0.98    | 0.330226 |              |
| GC3               | -0.09352 | 0.08833    | -1.059  | 0.292866 |              |

501 Signif. codes: 0 '\*\*\*' 0.001 '\*\*' 0.01 '\*' 0.05 '.' 0.1 ' ' 1

502 Residual standard error: 0.1071 on 80 degrees of freedom

503 Multiple R-squared: 0.3628, Adjusted R-squared: 0.331

504 F-statistic: 11.39 on 4 and 80 DF, p-value: 2.296e-07

505

506 Multiple regression. Dependent variable: OD, BL21 cells

| Coefficients      | Estimate | Std. Error | t value | Pr(> t ) | Significance |
|-------------------|----------|------------|---------|----------|--------------|
| GFP_155_nt490-720 | -0.20718 | 0.02904    | -7.135  | 2.29E-11 | ***          |

|                   |          |         |         |          |     |
|-------------------|----------|---------|---------|----------|-----|
| GFP_170_nt514-645 | -0.40684 | 0.03874 | -10.501 | < 2e-16  | *** |
| CAI               | 0.36495  | 0.08492 | 4.298   | 2.82E-05 | *** |
| GC3               | -0.04033 | 0.06678 | -0.604  | 0.547    |     |

507 Signif. codes: 0 '\*\*\*' 0.001 '\*\*' 0.01 '\*' 0.05 '.' 0.1 ' ' 1

508 Residual standard error: 0.09221 on 180 degrees of freedom

509 Multiple R-squared: 0.5559, Adjusted R-squared: 0.546

510 F-statistic: 56.32 on 4 and 180 DF, p-value: < 2.2e-16

### 511 **Western blotting**

512 For Western blotting, BL21 strains carrying non-toxic and toxic GFP constructs +/- RBS were  
513 grown in 2 ml LB with ampicillin, overnight in snap cap tubes, at 37°C. Following growth to  
514 saturation, cells were diluted 1:100 in LB containing ampicillin (100 µg/ml) and allowed to  
515 grow until OD reached ~0.5 and then induced with 1mM IPTG. Un-induced samples were  
516 collected before adding IPTG as control. After 1.5 h of induction, 1-2 ml of cultures were  
517 pelleted. Pellets were re-suspended in standard RIPA buffer and briefly sonicated in presence  
518 of Protease inhibitor (Roche) to lyse the cells. The lysate was further spun at 14000rpm for 5  
519 mins to get rid of debris and the total protein was estimated by BCA assay (Pierce BCA  
520 protein estimation kit). 10µg of protein was resolved on 10% Bis-Tris gel. Prestained  
521 PageRuler protein ladder (ThermoFisher Scientific) was used as standard. Following  
522 electrophoresis the gel was transferred onto Nitrocellulose membrane using iblot2 gel transfer  
523 device (Invitrogen). The following antibodies were used for detection: Polyclonal Anti-GFP  
524 antibody (ab290, abcam), 1:5000, and goat anti-rabbit IgG-HRP conjugate (Santa Cruz  
525 Biotech, SC2030 ), 1:10000.

526 In the case of Flag fusion constructs, cells were grown and processed as described above. 13

527 µg of protein was resolved on 4-12% Bis-Tris gel. Prestained Benchmark protein ladder

528 (Invitrogen) was used as standard. The following antibodies were used for detection, Flag M2

529 Monoclonal antibody (F3165, Sigma), 1:2000 and goat anti-mouse IgG-HRP conjugate  
530 (Santa Cruz Biotech, SC2031), 1:10000. The membranes were developed by soaking in  
531 Chemiluminescent substrate (Protein simple) and blots were imaged on Imagequant  
532 LAS4000 (GE Healthcare).  
533  
534

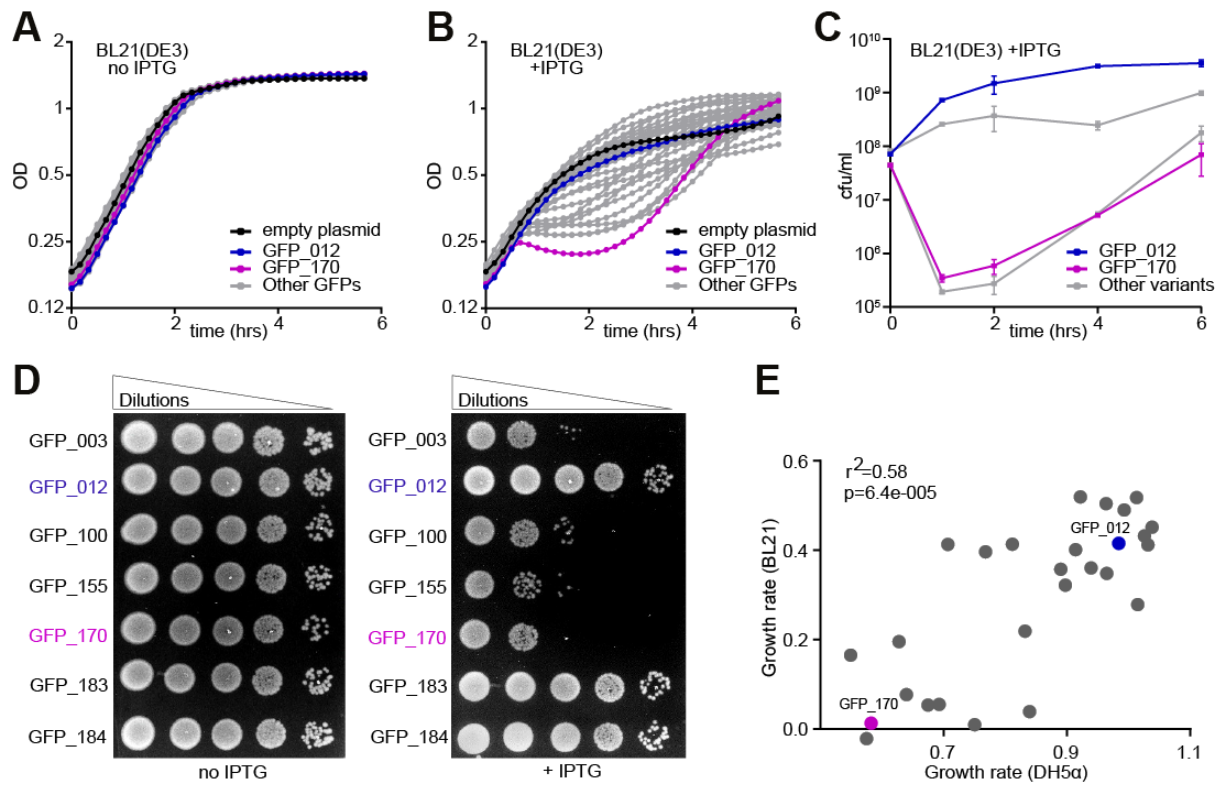

535

536

537 **Figure 1. GFP variants are toxic in *E. coli*.** (A-B) Growth curves of BL21 *E. coli* cells,  
 538 non-induced (A) or induced with 1 mM IPTG at t=0h (B). Cells carrying GFP\_012 (non-toxic  
 539 variant, blue), GFP\_170 (toxic variant, magenta), pGK8 (empty vector control, black) and 29  
 540 other variants (grey) are shown. Each curve represents an average of 9 replicates (3 biological  
 541 x 3 technical). OD, optical density. (C) Numbers of colony forming units (cfu)/ml at  
 542 specified time points after induction with 1 mM IPTG. Data points represent averages of 4  
 543 replicates, +/- SEM. (D) Semi-quantitative estimation of BL21 cell viability by spot assay.  
 544 (E) Estimated growth rates of cells expressing GFP variants in DH5α and BL21 strains  
 545 (averages of at least 6 replicates).

546



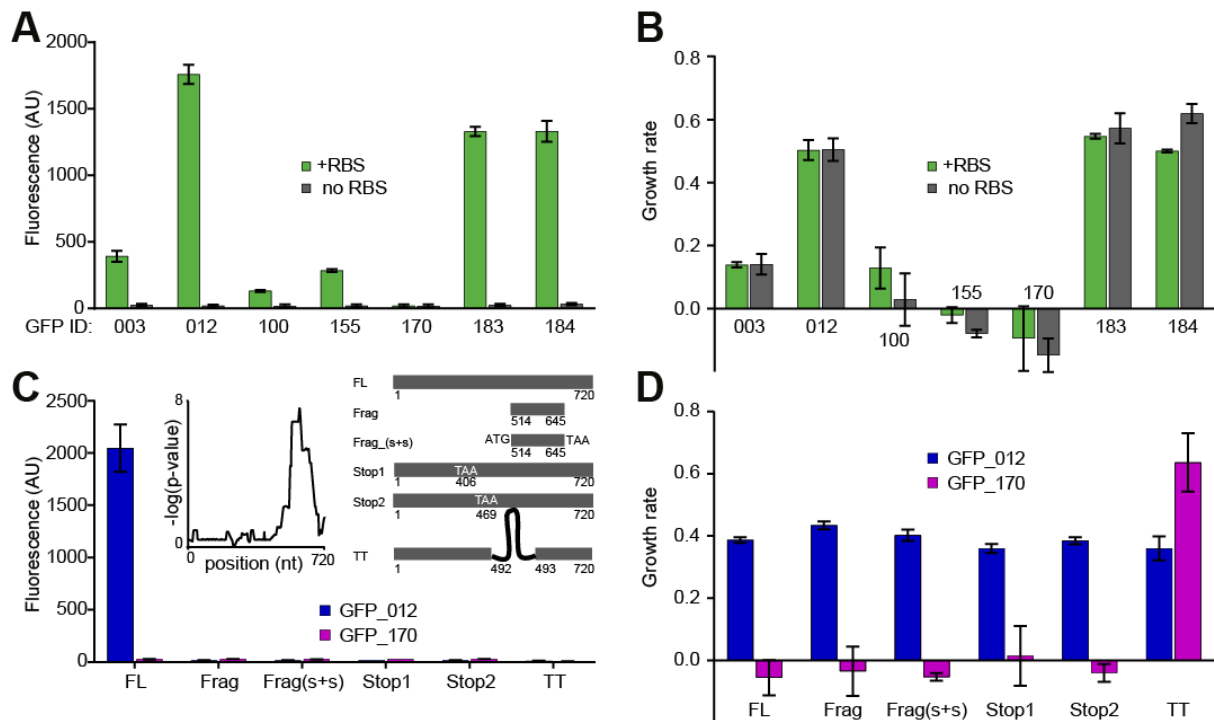

547

548

549 **Figure 2. Toxicity of GFP variants is independent of translation. (A-B)** Fluorescence (A)

550 and growth rate (B) of BL21 cells expressing GFP variants with functional and non-

551 functional ribosome-binding sites (RBS). **(C-D)** Fluorescence (C) and growth rate (D) of

552 cells expressing full-length GFP variants, truncated variants, and variants containing internal

553 stop codons or transcription terminators. Inset in (C) shows location of toxic sequence

554 element in GFP\_170 which was calculated based on an analysis of growth rates of 36

555 shuffled constructs. The Y-axis shows the statistical significance of the association of

556 particular positions with slow growth. Variants derived from non-toxic GFP\_012 are shown

557 in blue, and variants derived from toxic GFP\_170 are shown in magenta. Full-length

558 constructs, truncated constructs and constructs with internal stop codons have similar growth

559 rates, suggesting that the element of toxicity resides within the truncated fragment and that

560 the mechanism of toxicity is independent of translation. FL, full-length construct; TT, T7

561 transcription terminator. All data are averages of 9 replicates, +/- SEM.

562

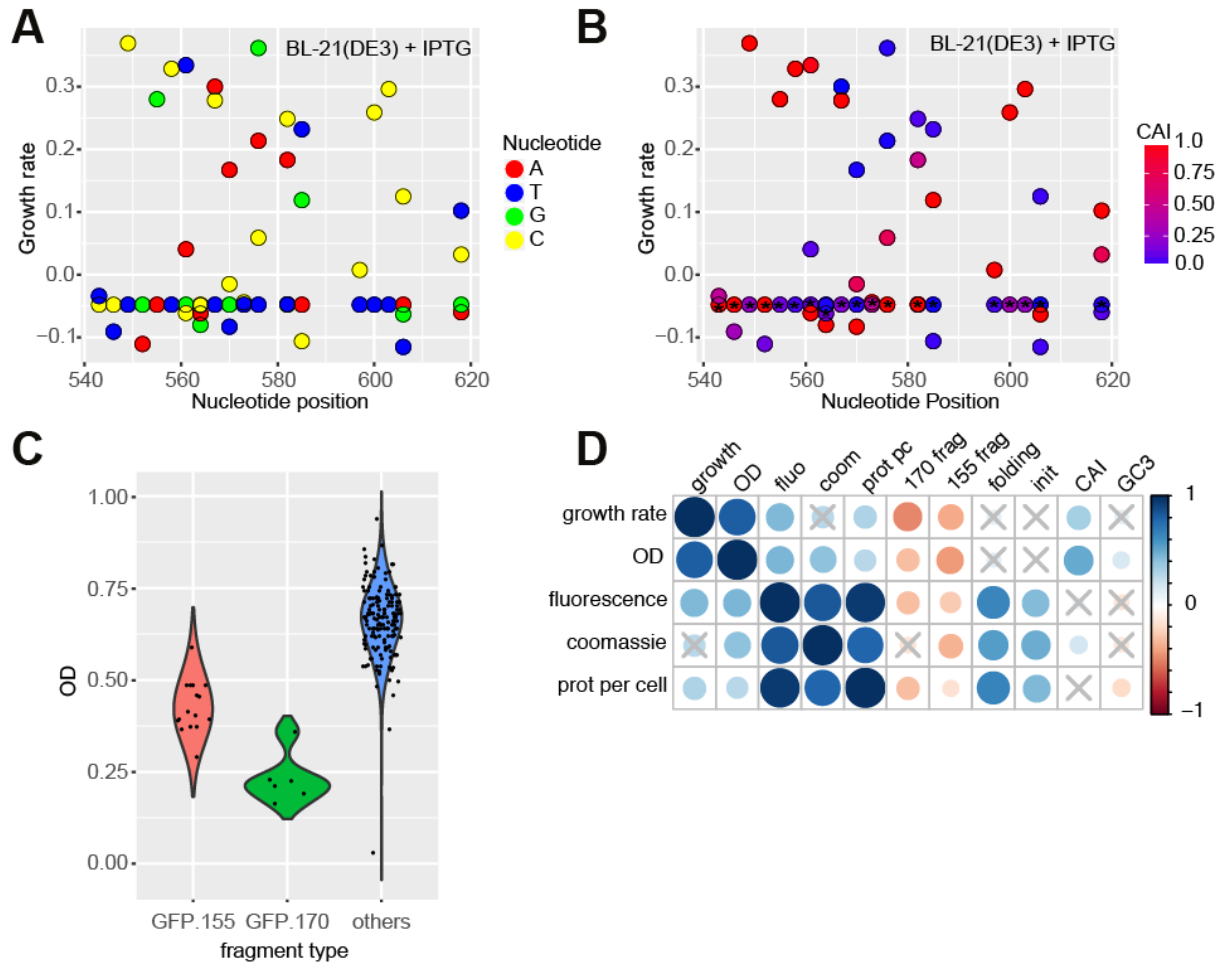

563

564

565 **Figure 3. Multiple sequence elements determine RNA-mediated toxicity. (A)** Growth

566 rates of single synonymous mutants of GFP\_170, measured in BL21 strain (averages of 9

567 replicates). Mutations located throughout the toxic region reduce or abolish toxicity. **(B)**

568 Relationship between Codon Adaptation Index (CAI) and the growth rate of GFP mutants.

569 Asterisk-marked codons represent the original codon in GFP\_170. **(C)** Growth estimate

570 (optical density) of BL21 cells expressing GFP variants containing fragments: GFP\_155 nt

571 490-720 (N=16, red), GFP\_170 nt 514-645 (N=6, green), and other variants (N=163, blue).

572 **(D)** Spearman correlation analysis of phenotypes measured in BL21 cells and sequence

573 covariates in a set of 190 GFP variants. The size and colour of circles represents the

574 correlation coefficient; crosses indicate non-significant correlations.

575

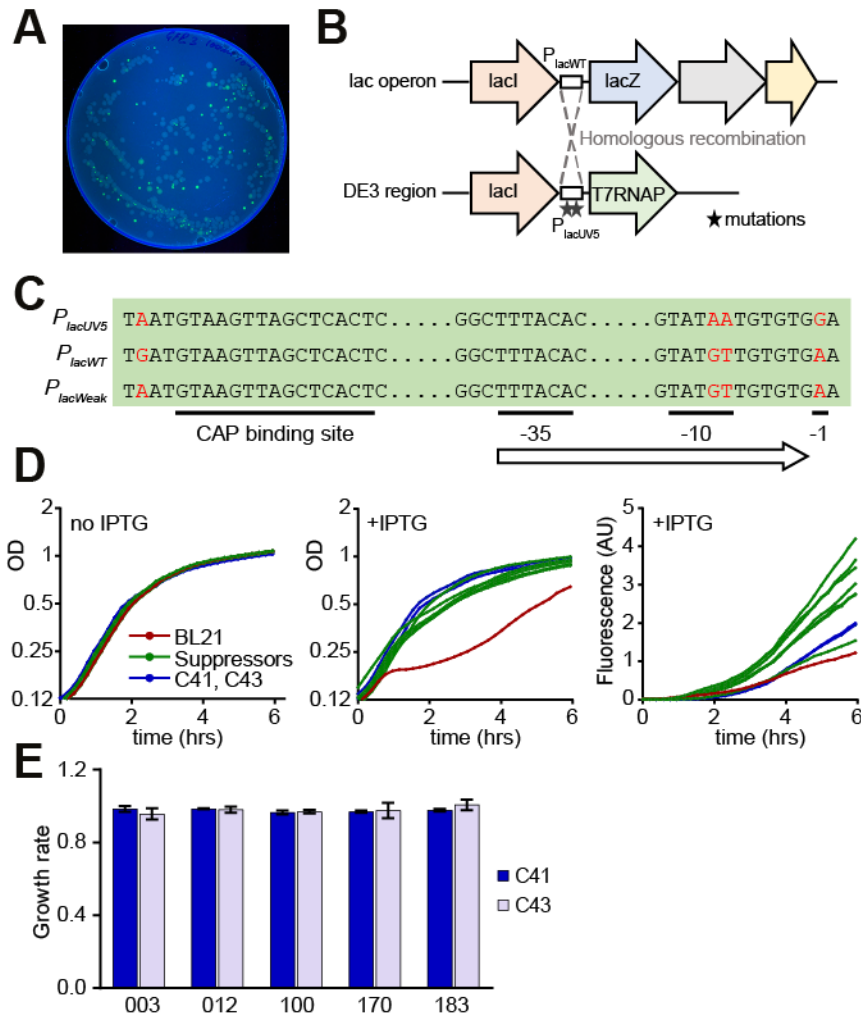

576

577

578 **Figure 4. Isolation and characterization of genetic suppressors of toxicity. (A)**

579 Fluorescence image of LB+Amp+IPTG Petri dish with BL21 cells expressing GFP\_003

580 variant. **(B)** Genetic organization of *lac* and DE3 loci in BL21 cells. Dashed lines indicate

581 homologous recombination between the loci in suppressor strains. **(C)** Sequence variation

582 between the three types of promoters found in the suppressor strains. Substitutions are

583 marked in red. **(D)** Growth curves and fluorescence of strains carrying the GFP\_003 variant:

584 parental BL21 strain (red), suppressors strains (N=7, green), C41 and C43 strains (blue). **(E)**

585 Growth rates of C41 and C43 cells expressing several GFP variants. GFP\_003, GFP\_100 and

586 GFP\_170 are toxic in the BL21 strain, GFP\_012 and GFP\_183 are not. Growth curves are

587 averages of 3 replicates.

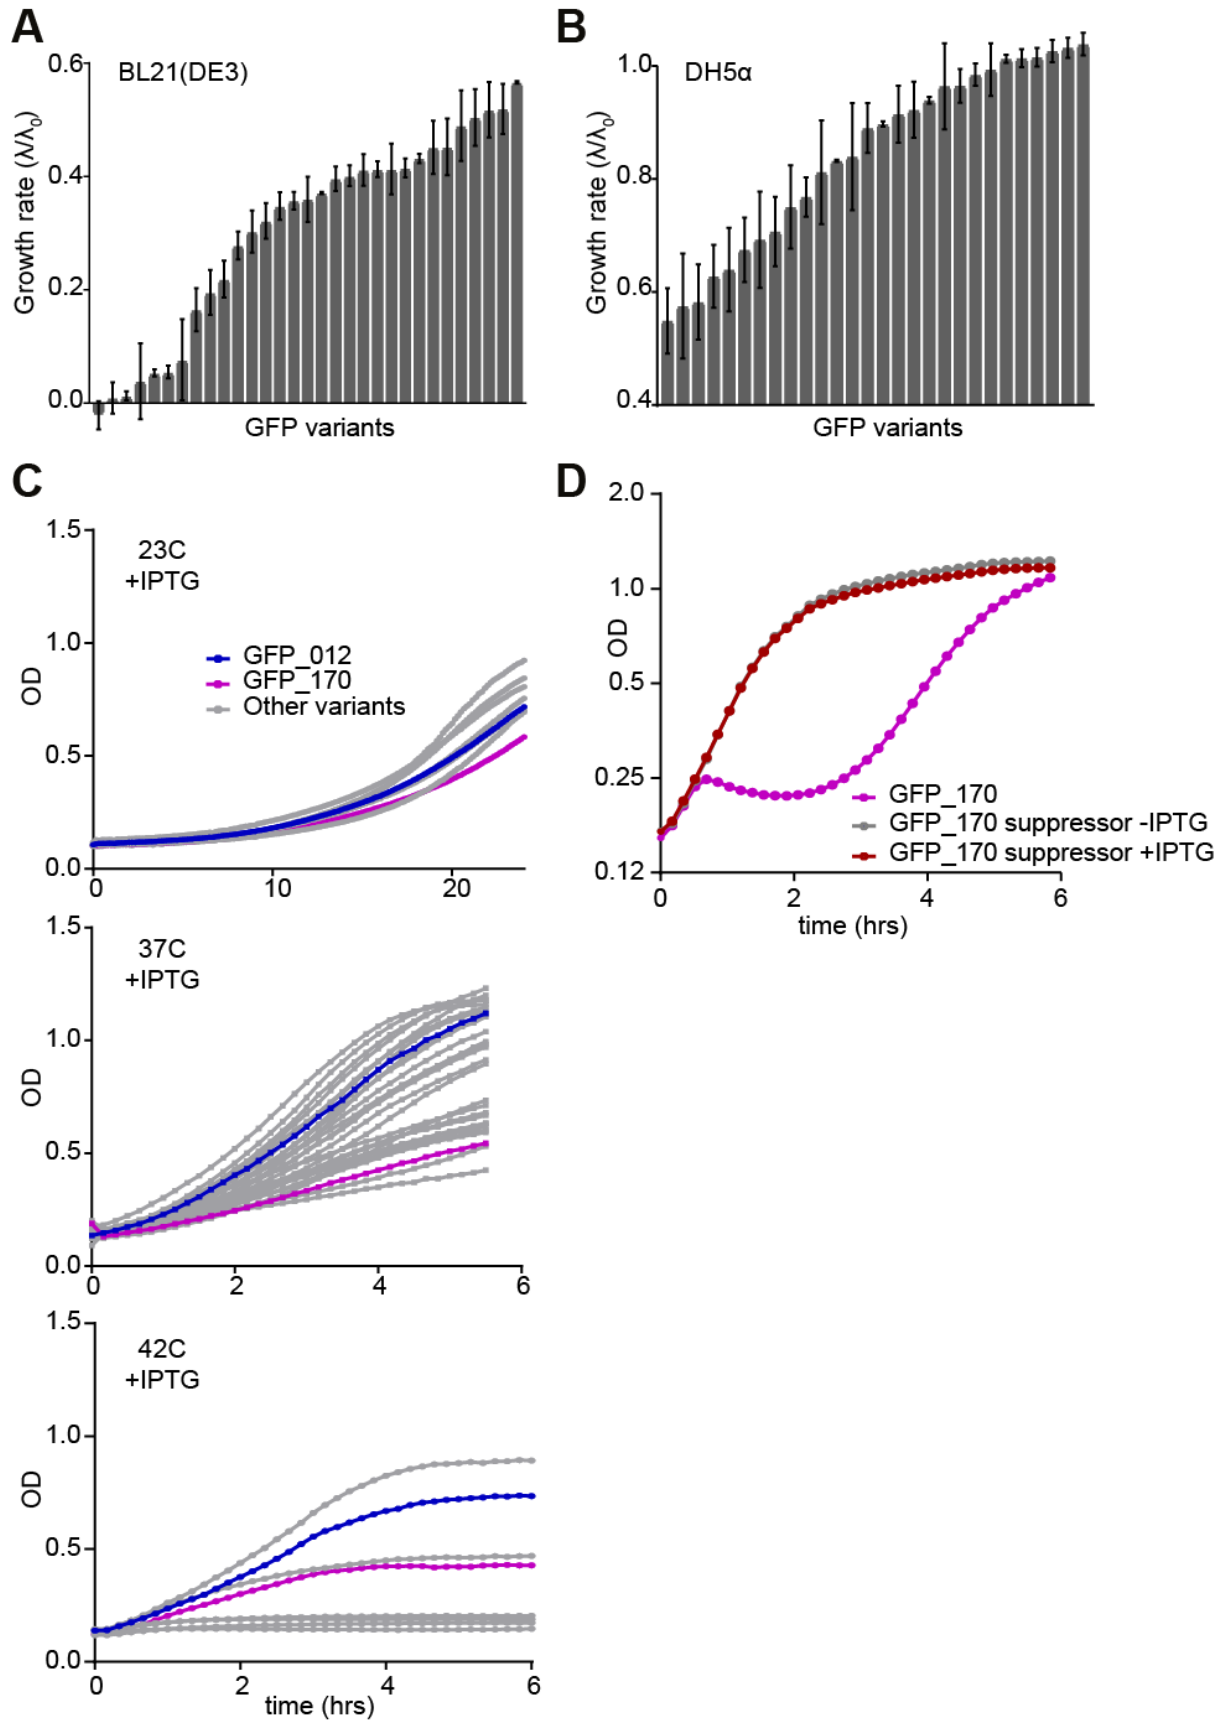

588

589

590 **Supplementary Figure 1. Growth phenotypes of GFP variants. (A-B)** Growth rates in  
591 BL21 cells (A) and DH5 $\alpha$  (B) in the presence of IPTG, sorted from minimum to maximum  
592 growth rate in each strain. **(C)** Growth curves of DH5 $\alpha$  cells at different temperatures (23°C,  
593 37°C and 42°C) in presence of IPTG. At 23°C there are minor variations in growth of cells  
594 expressing GFP variants, at 37°C there are large variations, and at 42°C, some of the GFP  
595 variants fail to grow altogether. GFP\_012 (non-toxic, blue), GFP\_170 (toxic, magenta), other  
596 variants (grey). The growth curves represent averages of at least 6 replicates. **(D)** Growth  
597 curve of BL21 cells expressing GFP\_170 (magenta); suppressor isolated after back-diluting  
598 cells expressing GFP\_170 in presence (red) and absence (grey) of IPTG. The suppressor  
599 strain has similar growth phenotypes both in presence and absence of IPTG.  
600

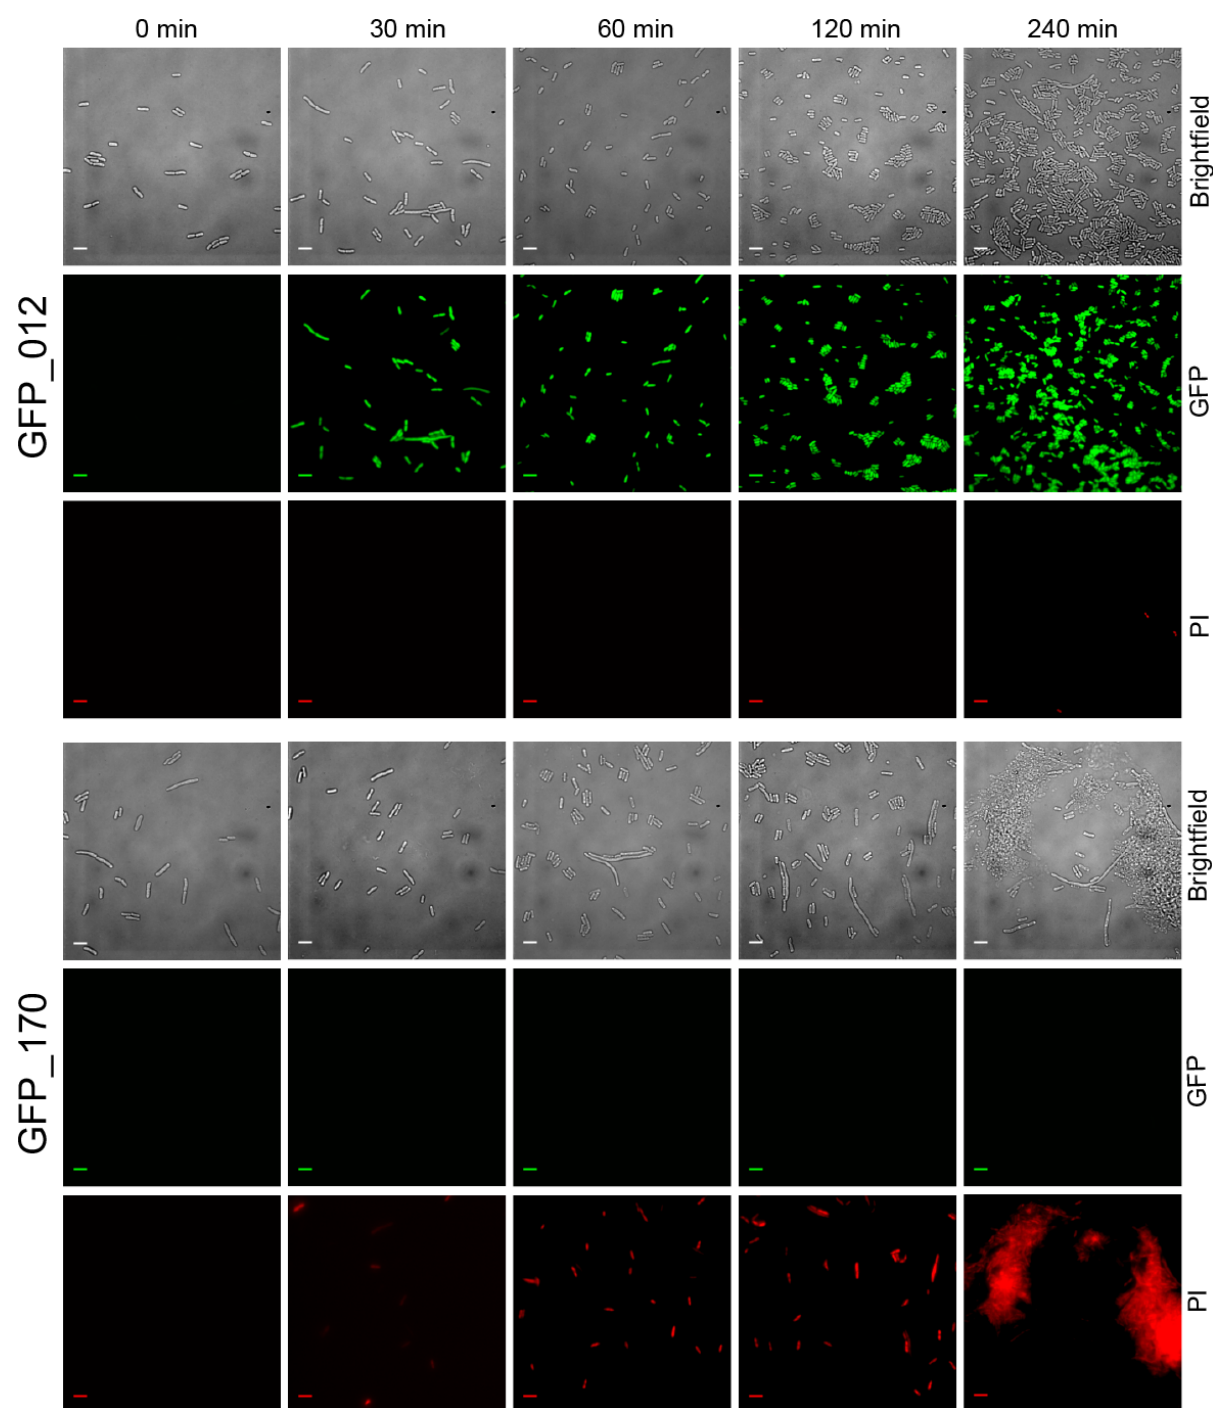

601

602

603 **Supplementary Figure 2. Microscopic analysis of cell viability.** Cell viability was  
604 estimated for BL21 cells expressing GFP\_012 (non-toxic variant) and GFP\_170 (toxic  
605 variant). Brightfield images give an estimate of cell morphology and densities. GFP and RFP  
606 channels were used to determine the number of cells expressing GFP and the number of dead  
607 cells stained by Propidium Iodide (PI) respectively. At 0 min (just before IPTG induction)

608 GFP\_012 and GFP\_170 cultures have similar cell densities and morphology. For cells  
609 expressing GFP\_012, we see a steady increase in cell number after induction and GFP  
610 expression appears after 30 mins of induction. There is no significant cell death (PI stained  
611 cells) at any given time point. For cells expressing GFP\_170 cell densities do not increase  
612 rapidly and most cells lose their morphology. We see a rapid increase in number of dead cells  
613 and the severity of the phenotype can be estimated at 240 min time point when PI staining  
614 shows only dead cells or debris from the dead cells. GFP expression is not seen for GFP\_170  
615 due to a strong mRNA secondary structure at its 5' end, impeding its translation. The scale  
616 bar is 5  $\mu$ m.  
617

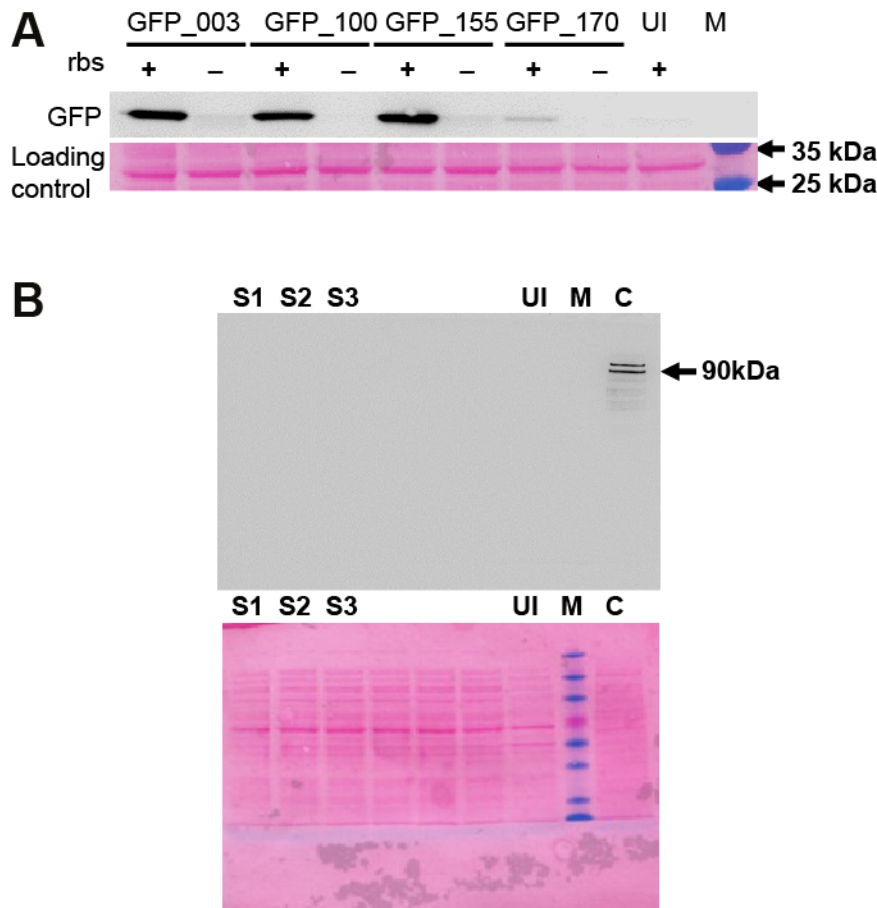

618

619

620 **Supplementary Figure 3. Measurement of GFP expression by Western blotting (A)**

621 Expression of four toxic variants of GFP in the presence and absence of RBS. UI, uninduced

622 control; M, marker. GFP expression was analysed by probing with anti-GFP polyclonal

623 antibody (abcam 290). Ponceau stained blot shows equal loading. **(B)** GFP\_170 toxic

624 fragment (nt 514-645) expression fused to FLAG tag in all three reading frames (S1, S2, and

625 S3) was analysed by probing with monoclonal Anti-FLAG (F3165 sigma). UI, uninduced

626 control; M, marker; C, control sample expressing two Flag-tagged proteins of size 116 and 90

627 kDa. No FLAG expression was detected from S1, S2 or S3 constructs.

628



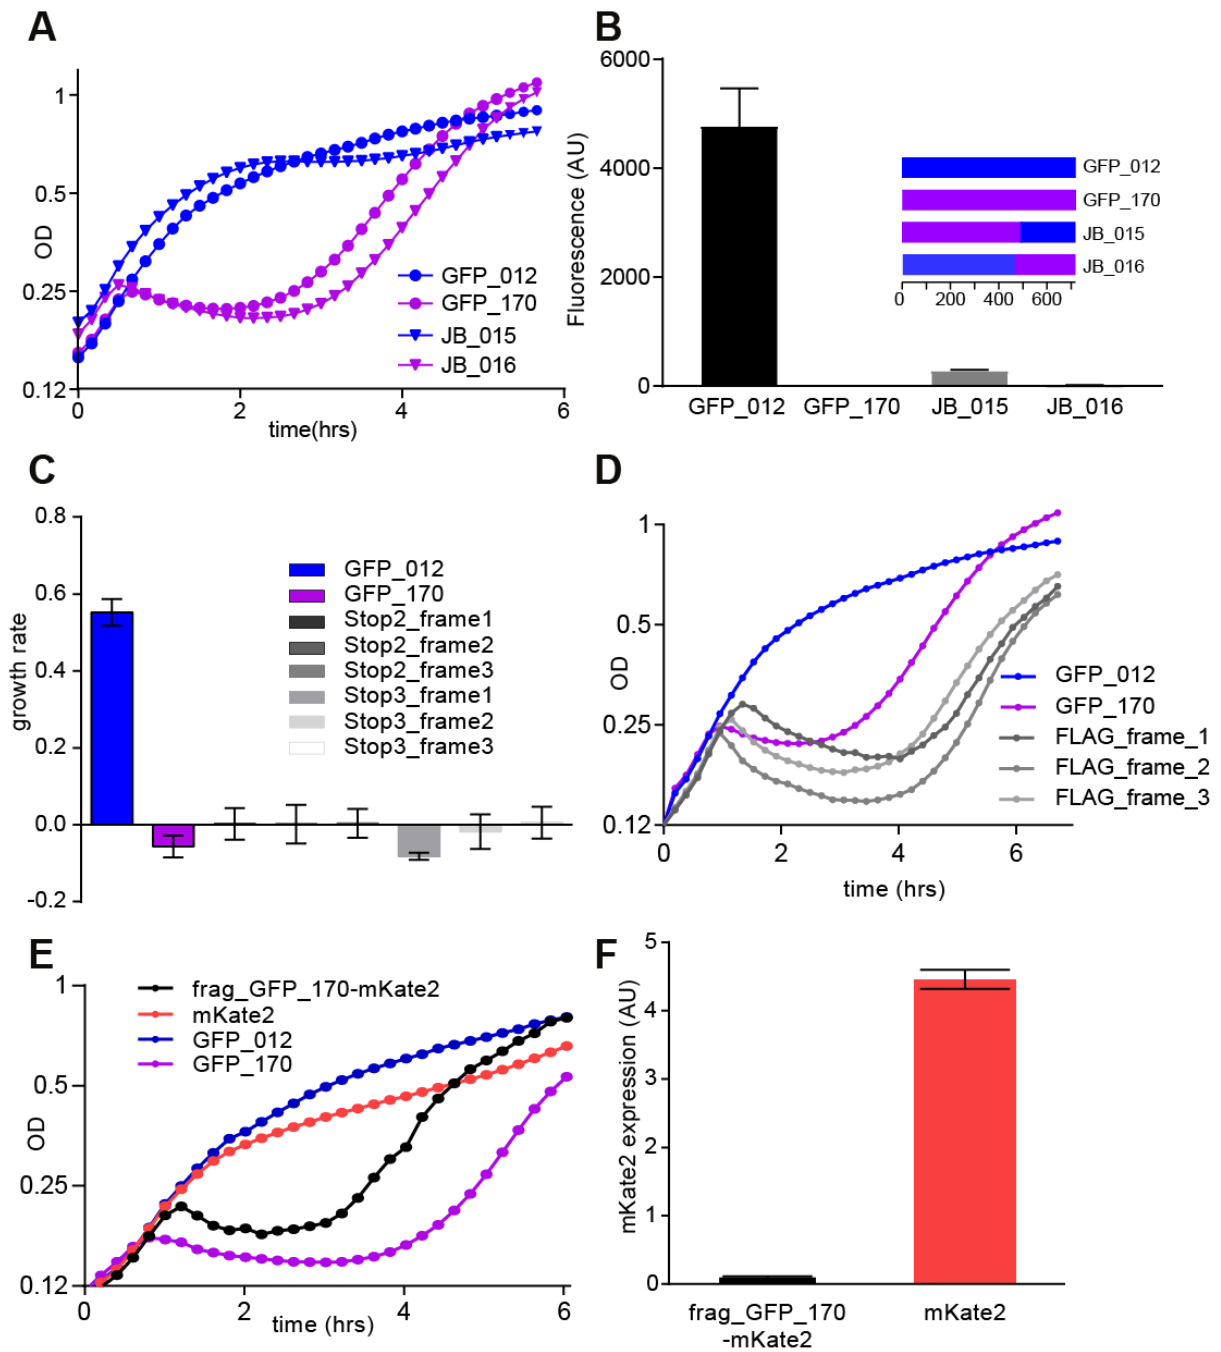

629

630 **Supplementary Figure 4. The toxic element resides near the 3' end of GFP\_170 and**

631 **toxicity is independent of translation. (A)** Growth curve for BL21 cells expressing

632 constructs GFP\_012, GFP\_170 and their shuffled variants JB\_015 and JB\_016. JB\_015

633 consists of GFP\_170 (nts 1-497) and GFP\_012 (498-720); JB\_016 consists of GFP\_012 (1-

634 449) and GFP\_170 (450-720). **(B)** Fluorescence of the shuffled constructs. JB\_015 is non-

635 toxic and shows a low level of fluorescence; JB\_016 and GFP\_170 are toxic and almost non-

636 fluorescent. (C) Growth rate of cells expressing GFP\_170 constructs with internal stop  
637 codons before and after the toxic fragment (nt 514-645) in all three reading frames. TAA stop  
638 codons were inserted at nucleotide positions 469 (stop2\_frame1), 470 (stop2\_frame2) and  
639 471 (stop2\_frame3) upstream of the toxic fragment and 643 (stop3\_frame1), 644  
640 (stop3\_frame2) and 645 (stop3\_frame3) downstream of toxic fragment. (D) Growth curves of  
641 constructs having toxic fragment from GFP\_170 fused to FLAG tag at the 3' end in all three  
642 reading frames. All three constructs retain toxicity. (E) Growth curves of mKate2 and toxic  
643 GFP\_170 fragment fused to mKate2 at the 5' end. Fusion construct retains toxicity (F)  
644 Expression of mKate2. No fluorescence is detected when mKate2 is fused with the toxic  
645 fragment from GFP\_170.  
646  
647

648

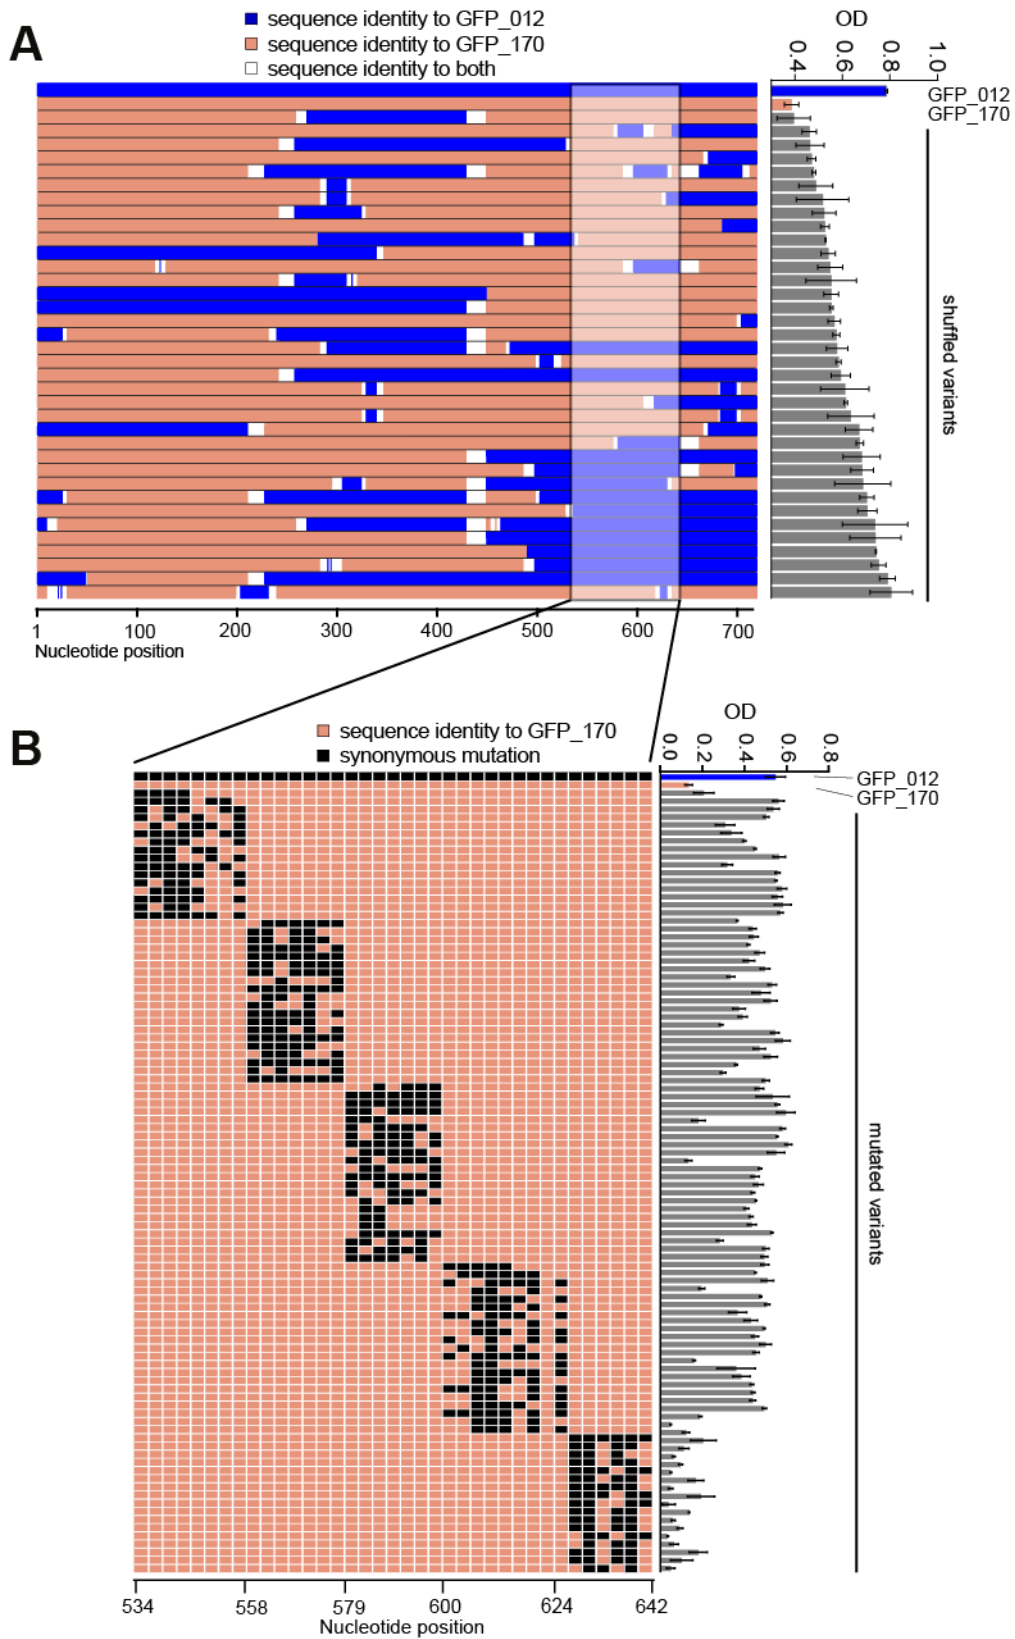

649

650 **Supplementary Figure 5. Growth analysis of GFP constructs generated by shuffling and**

651 **multiple synonymous mutations. (A) 36 constructs were generated by DNA shuffling of**

652 GFP\_012 (blue) and GFP\_170 (orange). All constructs encode full length GFP. Constructs  
653 are colour coded according to the sequence identity with GFP\_012 and GFP\_170. The  
654 constructs from top to bottom are arranged in ascending order of their growth (OD 595nm).  
655 The highlighted region shows that most constructs having sequence identical to GFP\_170  
656 (orange) in 520-620 nt region are toxic. **(B)** An inset of the highlighted area from Panel A  
657 summarizes the results of multiple synonymous mutations that were generated in the toxic  
658 region. Each row represents a particular mutated variant and each column represents the  
659 nucleotide position. Columns highlighted orange and black represent nucleotides identical to  
660 GFP\_170 and synonymous substitutions respectively. Each construct has 2-9 substitutions.  
661 Synonymous mutations in the region 534-624 nt reduce or abolish the toxicity of GFP\_170  
662 but any number of synonymous mutations in 627-642 nt region had no effect on toxicity. All  
663 data are averages of 9 replicates, +/- SEM.  
664

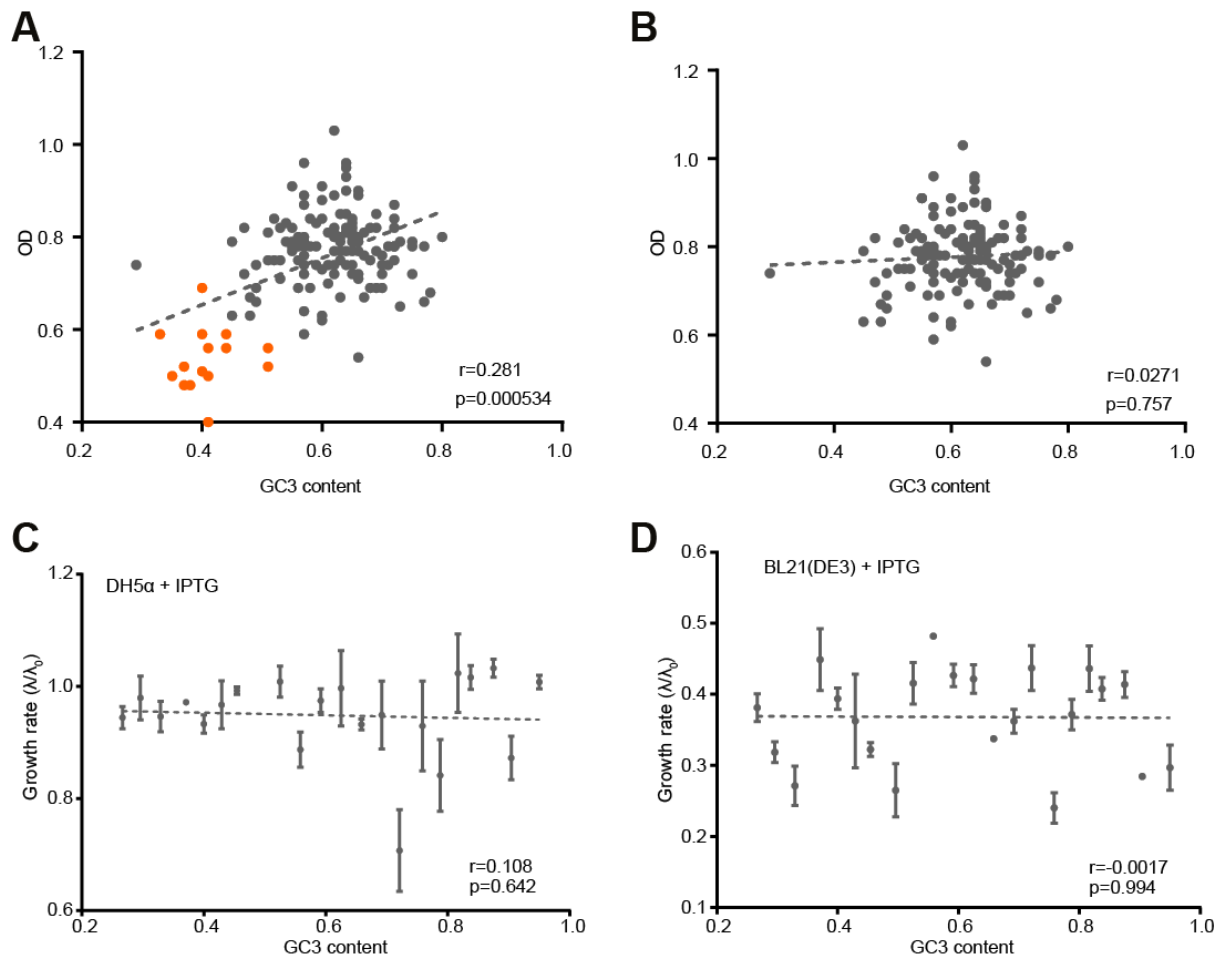

665

666

667 **Supplementary Figure 6. No correlation between GC3 content and growth rate of GFP**

668 **variants. (A-B)** The correlation between GC3 content and growth (OD 595nm) of GFP

669 variants in BL21 cells is driven by two toxic RNA fragments shared between a number of

670 variants: GFP\_155 nt 490-720, and GFP\_170 nt 514-645, marked in orange. After removal of

671 these variants (panel B), we no longer see any relationship between GC3 content and growth.

672 **(C-D)** There is no relationship between GC3 content and growth in an independent set of 22

673 GFP constructs, either in DH5 $\alpha$  (C) or BL21 (D) strains. All data are averages of 9 replicates,

674 +/- SEM.

675

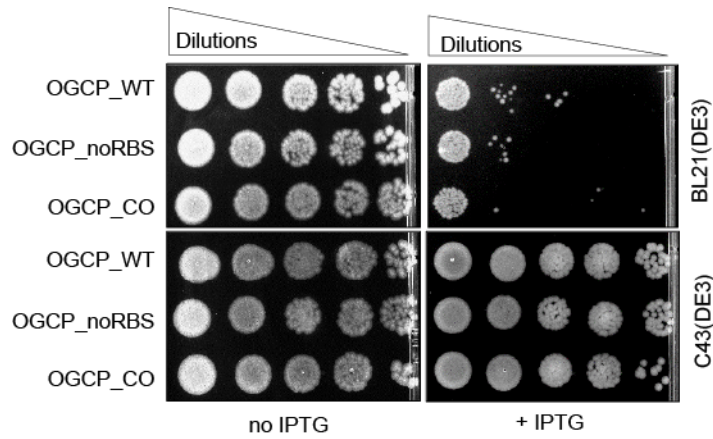

676

677

678 **Supplementary Figure 7. Spot assay for semi-quantitative estimation of cell viability of**

679 **BL21 cells expressing OGCP variants.** OGCP-WT (wild type OGCP), OGCP\_noRBS

680 (OGCP lacking functional RBS) and OGCP\_CO (codon-optimized OGCP) variants were

681 cloned in pGK8 plasmid and transformed in BL21 and C43 strains. In the absence of IPTG

682 there are no difference in the viabilities between strains or constructs; in the presence of

683 IPTG, the three constructs are toxic in BL21 cells but not in C43 cells.

684

| Strain | Isolated from | Color | Genotype                                     |
|--------|---------------|-------|----------------------------------------------|
| Sup_01 | GFP_003       | Green | P <sub>lacWeak</sub>                         |
| Sup_02 | GFP_003       | Green | P <sub>lacWT</sub>                           |
| Sup_03 | GFP_003       | Green | P <sub>lacWeak</sub>                         |
| Sup_04 | GFP_003       | Green | P <sub>lacWT</sub>                           |
| Sup_05 | GFP_003       | Green | P <sub>lacWT</sub>                           |
| Sup_06 | GFP_003       | Green | P <sub>lacWT</sub>                           |
| Sup_07 | GFP_003       | Green | P <sub>lacWT</sub>                           |
| Sup_08 | GFP_003       | Green | P <sub>lacWT</sub>                           |
| Sup_10 | GFP_003       | Green | P <sub>lacWT</sub>                           |
| Sup_12 | GFP_003       | White | P <sub>lacUV5</sub>                          |
| Sup_14 | GFP_069       | Green | P <sub>lacWT</sub>                           |
| Sup_15 | GFP_069       | Green | P <sub>lacWT</sub>                           |
| Sup_17 | GFP_069       | Green | P <sub>lacWT</sub>                           |
| Sup_18 | GFP_069       | White | P <sub>lacUV5</sub>                          |
| Sup_21 | GFP_183       | Green | P <sub>lacWT</sub>                           |
| Sup_22 | GFP_183       | Green | P <sub>lacWeak</sub>                         |
| Sup_24 | GFP_183       | White | P <sub>lacUV5</sub>                          |
| Sup_26 | GFP_155       | Green | P <sub>lacWT</sub>                           |
| Sup_30 | GFP_155       | Green | P <sub>lacWT</sub>                           |
| Sup_34 | GFP_100       | Green | P <sub>lacWT</sub>                           |
| Sup_35 | GFP_100       | Green | P <sub>lacWT</sub>                           |
| Sup_37 | GFP_170       | White | P <sub>lacUV5</sub> /P <sub>lacWeak</sub> ** |

\*\* We observed a mix of two types of reads in sequencing analysis for this strain

685

686

687 **Supplementary Table 1. Analysis of suppressor genotypes.** 15/18 green suppressors

688 showed a complete replacement of P<sub>lacUV5</sub> promoter with P<sub>lacWT</sub>, 3/18 showed replacement of

689 P<sub>lacUV5</sub> with P<sub>lacWeak</sub>. 3/4 white suppressors had no changes in the promoter of T7 RNA

690 polymerase, while for 1/4 we could not definitively assign the promoter type.

691

- 692 1. Zhou, Z. et al. Codon usage is an important determinant of gene expression levels  
693 largely through its effects on transcription. *Proc Natl Acad Sci U S A* **113**, E6117-  
694 E6125 (2016).
- 695 2. Kudla, G., Murray, A.W., Tollervey, D. & Plotkin, J.B. Coding-sequence determinants  
696 of gene expression in Escherichia coli. *Science* **324**, 255-258 (2009).
- 697 3. Goodman, D.B., Church, G.M. & Kosuri, S. Causes and effects of N-terminal codon  
698 bias in bacterial genes. *Science* **342**, 475-479 (2013).
- 699 4. Sorensen, M.A., Kurland, C.G. & Pedersen, S. Codon usage determines translation  
700 rate in Escherichia coli. *J Mol Biol* **207**, 365-377 (1989).
- 701 5. Akashi, H. Synonymous codon usage in Drosophila melanogaster: natural selection  
702 and translational accuracy. *Genetics* **136**, 927-935 (1994).
- 703 6. Drummond, D.A. & Wilke, C.O. Mistranslation-induced protein misfolding as a  
704 dominant constraint on coding-sequence evolution. *Cell* **134**, 341-352 (2008).
- 705 7. Presnyak, V. et al. Codon optimality is a major determinant of mRNA stability. *Cell*  
706 **160**, 1111-1124 (2015).
- 707 8. Pagani, F., Raponi, M. & Baralle, F.E. Synonymous mutations in CFTR exon 12 affect  
708 splicing and are not neutral in evolution. *Proc Natl Acad Sci U S A* **102**, 6368-6372  
709 (2005).
- 710 9. Plotkin, J.B. & Kudla, G. Synonymous but not the same: the causes and consequences  
711 of codon bias. *Nat Rev Genet* **12**, 32-42 (2011).
- 712 10. Gu, W., Zhou, T. & Wilke, C.O. A universal trend of reduced mRNA stability near the  
713 translation-initiation site in prokaryotes and eukaryotes. *PLoS Comput Biol* **6**,  
714 e1000664 (2010).
- 715 11. Chamary, J.V., Parmley, J.L. & Hurst, L.D. Hearing silence: non-neutral evolution at  
716 synonymous sites in mammals. *Nat Rev Genet* **7**, 98-108 (2006).
- 717 12. Kelsic, E.D. et al. RNA Structural Determinants of Optimal Codons Revealed by  
718 MAGe-Seq. *Cell systems* **3**, 563-571 e566 (2016).
- 719 13. Knoppel, A., Nasvall, J. & Andersson, D.I. Compensating the Fitness Costs of  
720 Synonymous Mutations. *Mol Biol Evol* **33**, 1461-1477 (2016).
- 721 14. Frumkin, I. et al. Gene Architectures that Minimize Cost of Gene Expression. *Mol Cell*  
722 **65**, 142-153 (2017).
- 723 15. Agashe, D. et al. Large-Effect Beneficial Synonymous Mutations Mediate Rapid and  
724 Parallel Adaptation in a Bacterium. *Mol Biol Evol* **33**, 1542-1553 (2016).
- 725 16. Raghavan, R., Kelkar, Y.D. & Ochman, H. A selective force favoring increased G+C  
726 content in bacterial genes. *Proc Natl Acad Sci U S A* **109**, 14504-14507 (2012).
- 727 17. Brandis, G. & Hughes, D. The Selective Advantage of Synonymous Codon Usage Bias  
728 in Salmonella. *PLoS Genet* **12**, e1005926 (2016).
- 729 18. Salis, H.M., Mirsky, E.A. & Voigt, C.A. Automated design of synthetic ribosome  
730 binding sites to control protein expression. *Nat Biotechnol* **27**, 946-950 (2009).
- 731 19. Stemmer, W.P. DNA shuffling by random fragmentation and reassembly: in vitro  
732 recombination for molecular evolution. *Proc Natl Acad Sci U S A* **91**, 10747-10751  
733 (1994).
- 734 20. Mairhofer, J., Wittwer, A., Cserjan-Puschmann, M. & Striedner, G. Preventing T7 RNA  
735 polymerase read-through transcription-A synthetic termination signal capable of  
736 improving bioprocess stability. *ACS synthetic biology* **4**, 265-273 (2015).
- 737 21. Krzyzosiak, W.J. et al. Triplet repeat RNA structure and its role as pathogenic agent  
738 and therapeutic target. *Nucleic Acids Res* **40**, 11-26 (2012).



- 739 22. Miroux, B. & Walker, J.E. Over-production of proteins in Escherichia coli: mutant  
740 hosts that allow synthesis of some membrane proteins and globular proteins at high  
741 levels. *J Mol Biol* **260**, 289-298 (1996).
- 742 23. Kwon, S.K., Kim, S.K., Lee, D.H. & Kim, J.F. Comparative genomics and experimental  
743 evolution of Escherichia coli BL21(DE3) strains reveal the landscape of toxicity escape  
744 from membrane protein overproduction. *Scientific reports* **5**, 16076 (2015).
- 745 24. Schlegel, S., Genevaux, P. & de Gier, J.W. De-convoluting the Genetic Adaptations of  
746 E. coli C41(DE3) in Real Time Reveals How Alleviating Protein Production Stress  
747 Improves Yields. *Cell reports* (2015).
- 748 25. Boel, G. et al. Codon influence on protein expression in E. coli correlates with mRNA  
749 levels. *Nature* **529**, 358-363 (2016).
- 750 26. Neme, R., Amador, C., Yildirim, B., McConnell, E. & Tautz, D. Random sequences are  
751 an abundant source of bioactive RNAs or peptides. *Nat Ecol Evol* **1**, 0217 (2017).
- 752 27. Cambray, G., Guimaraes, J.C. & Arkin, A.P. Massive Factorial Design Untangles Coding  
753 Sequences Determinants Of Translation Efficacy. *bioRxiv* (2017).
- 754 28. Andersson, S.G. & Kurland, C.G. Codon preferences in free-living microorganisms.  
755 *Microbiol Rev* **54**, 198-210 (1990).
- 756 29. Jain, A. & Vale, R.D. RNA phase transitions in repeat expansion disorders. *Nature*  
757 **546**, 243-247 (2017).
- 758 30. de Jong, I.G., Beilharz, K., Kuipers, O.P. & Veening, J.W. Live Cell Imaging of Bacillus  
759 subtilis and Streptococcus pneumoniae using Automated Time-lapse Microscopy.  
760 *Journal of visualized experiments : JoVE* (2011).
- 761 31. Braman, J., Papworth, C. & Greener, A. Site-directed mutagenesis using double-  
762 stranded plasmid DNA templates. *Methods Mol Biol* **57**, 31-44 (1996).
- 763 32. Lorimer, I.A. & Pastan, I. Random recombination of antibody single chain Fv  
764 sequences after fragmentation with DNaseI in the presence of Mn<sup>2+</sup>. *Nucleic Acids*  
765 *Res* **23**, 3067-3068 (1995).
- 766 33. Li, H. & Durbin, R. Fast and accurate short read alignment with Burrows-Wheeler  
767 transform. *Bioinformatics* **25**, 1754-1760 (2009).
- 768 34. Van der Auwera, G.A. et al. From FastQ data to high confidence variant calls: the  
769 Genome Analysis Toolkit best practices pipeline. *Current protocols in bioinformatics*  
770 **43**, 11 10 11-33 (2013).
- 771 35. Quinlan, A.R. & Hall, I.M. BEDTools: a flexible suite of utilities for comparing genomic  
772 features. *Bioinformatics* **26**, 841-842 (2010).
- 773 36. Sharp, P.M. & Li, W.H. The codon Adaptation Index--a measure of directional  
774 synonymous codon usage bias, and its potential applications. *Nucleic Acids Res* **15**,  
775 1281-1295 (1987).
- 776 37. Markham, N.R. & Zuker, M. UNAFold: software for nucleic acid folding and  
777 hybridization. *Methods Mol Biol* **453**, 3-31 (2008).
